1                   **Estimating local outbreak risks and the effects of non-**  
2                   **pharmaceutical interventions in age-structured populations:**  
3                               **SARS-CoV-2 as a case study**

4  
5   **Authors**

6   Francesca A. Lovell-Read<sup>1\*</sup>, Silvia Shen<sup>1,2</sup>, Robin N. Thompson<sup>3,4</sup>

7  
8   **Affiliations**

9   <sup>1</sup>Mathematical Institute, University of Oxford, Oxford, UK

10   <sup>2</sup>Pembroke College, University of Oxford, Oxford, UK

11   <sup>3</sup>Mathematics Institute, University of Warwick, Coventry, UK

12   <sup>4</sup>The Zeeman Institute for Systems Biology and Infectious Disease Epidemiology Research,  
13   University of Warwick, Coventry, UK

14  
15   **\* Corresponding author**

16   Address: Merton College, Merton Street, Oxford, OX1 4JD

17   E-mail: [francesca.lovell-read@merton.ox.ac.uk](mailto:francesca.lovell-read@merton.ox.ac.uk). Tel: +44 (0)1865 273525.

18  
19   **Abstract**

20   During the COVID-19 pandemic, non-pharmaceutical interventions (NPIs) including school  
21   closures, workplace closures and social distancing policies have been employed worldwide to  
22   reduce transmission and prevent local outbreaks. However, transmission and the effectiveness of

23 NPIs depend strongly on age-related factors including heterogeneities in contact patterns and  
24 pathophysiology. Here, using SARS-CoV-2 as a case study, we develop a branching process  
25 model for assessing the risk that an infectious case arriving in a new location will initiate a local  
26 outbreak, accounting for the age distribution of the host population. We show that the risk of a  
27 local outbreak depends on the age of the index case, and we explore the effects of NPIs targeting  
28 individuals of different ages. Social distancing policies that reduce contacts outside of schools  
29 and workplaces and target individuals of all ages are predicted to reduce local outbreak risks  
30 substantially, whereas school closures have a more limited impact. In the scenarios considered  
31 here, when different NPIs are used in combination the risk of local outbreaks can be eliminated.  
32 We also show that heightened surveillance of infectious individuals reduces the level of NPIs  
33 required to prevent local outbreaks, particularly if enhanced surveillance of symptomatic cases is  
34 combined with efforts to find and isolate nonsymptomatic infected individuals. Our results  
35 reflect real-world experience of the COVID-19 pandemic, during which combinations of intense  
36 NPIs have reduced transmission and the risk of local outbreaks. The general modelling  
37 framework that we present can be used to estimate local outbreak risks during future epidemics  
38 of a range of pathogens, accounting fully for age-related factors.

39

## 40 **Keywords**

41 mathematical modelling; infectious disease epidemiology; outbreak probability; SARS-CoV-2;  
42 COVID-19; age-structured models; non-pharmaceutical interventions.

43

## 44 **1. Introduction**

45 Throughout the COVID-19 pandemic, policy makers worldwide have relied on non-  
46 pharmaceutical interventions (NPIs) to limit the spread of SARS-CoV-2. Commonly introduced  
47 NPIs have included school closures, workplace closures and population-wide social distancing  
48 policies, all of which aim to reduce the numbers of contacts between individuals and disrupt  
49 potential chains of transmission [1-4]. Similar measures have previously been adopted for  
50 countering other infectious diseases such as Ebola and pandemic influenza [5-7], and are likely  
51 to remain a key line of defence against emerging pathogens that are directly transmitted between  
52 hosts. NPIs are particularly important when no effective treatment or vaccine is available, and  
53 they are also beneficial when vaccination programmes are being rolled out [8-10]. If vaccines do  
54 not prevent transmission completely, then NPIs may be important even when vaccination is  
55 widespread [11]. However, the negative economic, social and non-disease health consequences  
56 of NPIs have been widely discussed, with the impact of school closures on the academic progress  
57 and wellbeing of school-aged individuals a particular concern [7, 12-16]. Therefore, assessing  
58 the effectiveness of different NPIs at reducing transmission is critical for determining whether or  
59 not they should be used.

60  
61 Since NPIs such as school and workplace closures affect distinct age groups within the  
62 population, when evaluating their effectiveness it is important to account for age-dependent  
63 factors that influence transmission. Multiple studies have documented marked heterogeneities in  
64 the patterns of contacts between individuals in different age groups, with school-aged individuals  
65 tending to have more contacts each day than older individuals [17-23]. Since close contact  
66 between individuals is a key driver of transmission for respiratory pathogens such as influenza

67 viruses and SARS-CoV-2, these contact patterns influence transmission dynamics and  
68 consequently the effects of interventions that target different age groups [18, 19, 24-27].  
69 Additionally, many diseases are characterised by significant age-related variations in  
70 pathophysiology. For example, for SARS-CoV-2, children may be less susceptible to infection  
71 than adults [27-31], and more likely to experience asymptomatic or subclinical courses of  
72 infection [28, 31-36]. Since the secondary attack rate (the proportion of close contacts that lead  
73 to new infections) from asymptomatic or subclinical hosts is lower than from hosts with clinical  
74 symptoms [37-42], children are likely to be less infectious on average than older individuals who  
75 are at increased risk of developing symptoms [43-45].

76  
77 Previous studies have used age-stratified deterministic transmission models to investigate the  
78 effects of NPIs on COVID-19 epidemic peak incidence and timing. Prem *et al.* [46] projected the  
79 outbreak in Wuhan, China, over a one year period under different control scenarios, and  
80 demonstrated that a period of intense control measures including school closures, a 90%  
81 reduction in the workforce and a significant reduction in other social mixing could delay the  
82 epidemic peak by several months. Zhang *et al.* [27] predicted that eliminating all school contacts  
83 during the outbreak period would lead to a noticeable decrease in the peak incidence and a later  
84 peak; however, they did not take differences between symptomatic and asymptomatic cases into  
85 account explicitly. In contrast, Davies *et al.* [31] used estimates of age-dependent susceptibility  
86 and clinical fraction fitted to the observed age distribution of cases in six countries to  
87 demonstrate that school closures alone were unlikely to reduce SARS-CoV-2 transmission  
88 substantially. Davies *et al.* [47] subsequently concluded that a combination of several strongly

89 enforced NPIs would be necessary to avoid COVID-19 cases exceeding available healthcare  
90 capacity in the UK.

91  
92 Rather than considering the entire epidemic curve, here we focus on estimating the probability  
93 that cases introduced to a new location trigger a local outbreak as opposed to fading out with few  
94 cases. Localised clusters of transmission have been a feature of the COVID-19 pandemic [48-  
95 50], and assessing the risk that such local outbreaks occur requires a stochastic model in which  
96 the pathogen can either invade or fade out. Stochastic branching process models have been  
97 applied previously to assess outbreak risks for many pathogens without considering different age  
98 groups explicitly [51-55], and extended to consider adults and children as two distinct groups  
99 [56]. However, the significant heterogeneities in contact patterns and pathophysiology between  
100 individuals across the full range of ages have never previously been considered in estimates of  
101 local outbreak risks. Here, we develop an age-structured branching process model that can be  
102 used to estimate the probability of a local outbreak occurring for index cases of different ages,  
103 and demonstrate how the age-dependent risk profile changes when susceptibility to infection and  
104 clinical fraction vary with age.

105  
106 We use the model to investigate the effects on the local outbreak probability of NPIs that reduce  
107 the numbers of contacts between individuals. Specifically, we use location-specific contact data  
108 for the UK detailing the average numbers of daily contacts occurring in school, in the workplace  
109 and elsewhere [17] to model the impacts of school closures, workplace closures and broader  
110 social distancing policies. We demonstrate that, for SARS-CoV-2, contacts occurring outside  
111 schools and the workplace are a key driver of sustained transmission. Thus, population-wide

112 social distancing policies that affect individuals of all ages lead to a substantial reduction in the  
113 risk of local outbreaks. In contrast, since school-aged individuals only make up around one  
114 quarter of the UK population and tend to have large numbers of contacts outside school, school  
115 closures are predicted to have only a limited effect when applied as the sole NPI.

116  
117 We then go on to consider the impacts of mixed strategies made up of multiple NPIs, as well as  
118 additional NPIs that do not only reduce numbers of contacts. Specifically, we show that rigorous  
119 surveillance and effective isolation of infected hosts can reduce the level of contact-reducing  
120 NPIs required to achieve substantial reductions in the risk of local outbreaks. Although we use  
121 SARS-CoV-2 as a case study, our approach can be applied more generally to explore the effects  
122 of NPIs on the risk of outbreaks of any pathogen for which age-related heterogeneities play a  
123 significant role in transmission dynamics.

124

## 125 **2. Methods**

### 126 **2.1 Mathematical model**

127 We considered a branching process model in which the population was divided into 16 age  
128 groups, denoted  $G_1, G_2, \dots, G_{16}$ . The first 15 groups represent individuals aged 0-74, divided into  
129 five-year intervals (0-4, 5-9, 10-14 etc.). The final group represents individuals aged 75 and over.  
130 The total number of individuals in age group  $G_k$  is denoted  $N_k$ . Infected individuals in each age  
131 group  $G_k$  are classified into compartments representing asymptomatic ( $A_k$ ), presymptomatic ( $P_k$ )  
132 or symptomatic ( $S_k$ ) hosts, where an individual in the  $A_k$  compartment does not develop  
133 symptoms at any time during their course of infection.

134

135 An infected individual of any type in group  $G_k$  may generate new infections in any age group. In  
136 our model, the rate at which a single infected symptomatic individual in group  $G_k$  generates  
137 infections in group  $G_j$  is given by

$$138 \quad \beta_{kj} = B\tau_k\omega_j C_{kj}.$$

139 Here,  $\tau_k$  represents the infectivity of individuals in group  $G_k$ ,  $\omega_j$  represents the susceptibility to  
140 infection of individuals in group  $G_j$ ,  $C_{kj}$  represents the daily number of unique contacts a single  
141 individual in group  $G_k$  has with individuals in group  $G_j$ , and  $B$  is a scaling factor that can be used  
142 to set the reproduction number of the pathogen being considered (see Section 2.2). Since the  
143 initial phase of potential local outbreaks are the focus of this study, we did not account for  
144 depletion of susceptible hosts explicitly. The relative transmission rates from presymptomatic  
145 and asymptomatic individuals compared to symptomatic individuals are given by the scaled  
146 quantities  $\eta\beta_{kj}$  and  $\theta\beta_{kj}$ , respectively, where  $\eta$  and  $\theta$  were chosen so that the proportions of  
147 transmissions generated by presymptomatic and asymptomatic hosts were in line with literature  
148 estimates [57]. The parameter  $\xi_k$  represents the proportion of asymptomatic infections in group  
149  $G_k$ , so that a new infection in group  $G_k$  either increases  $A_k$  by one (with probability  $\xi_k$ ) or  
150 increases  $P_k$  by one (with probability  $1 - \xi_k$ ).

151  
152 A presymptomatic individual in group  $G_k$  may go on to develop symptoms (transition from  $P_k$   
153 to  $S_k$ ) or be detected and isolated (so that  $P_k$  decreases by one). A symptomatic individual in  
154 group  $G_k$  may be detected and isolated as a result of successful surveillance, or may be removed  
155 due to self-isolation, recovery or death (so that  $S_k$  decreases by one in either case). Similarly, an  
156 asymptomatic individual in group  $G_k$  may be detected and isolated or recover (so that  $A_k$   
157 decreases by one). A schematic of the different possible events in the model is shown in Fig 1.

158

159 The parameter  $\lambda$  represents the rate at which presymptomatic individuals develop symptoms, so  
160 that the expected duration of the presymptomatic infectious period is  $1/\lambda$  days in the absence of  
161 surveillance of nonsymptomatic infected individuals. Similarly, the expected duration of the  
162 asymptomatic infectious period in the absence of surveillance is  $1/\nu$  days. The parameter  $\mu$   
163 represents the rate at which symptomatic individuals are removed as a result of self-isolation,  
164 recovery or death, so that the duration of time for which they are able to infect others is  $1/\mu$   
165 days.

166

167 For each group  $G_k$ , the rate at which symptomatic individuals are detected and isolated as a result  
168 of enhanced surveillance is determined by the parameter  $\rho_k$ . Analogously, the parameter  $\sigma_k$   
169 governs the rate at which presymptomatic and asymptomatic individuals in  $G_k$  are detected and  
170 isolated. We assumed that surveillance measures targeting nonsymptomatic hosts are equally  
171 effective for those who are presymptomatic and those who are asymptomatic, and therefore used  
172 the same rate of isolation due to surveillance for both of these groups.

173



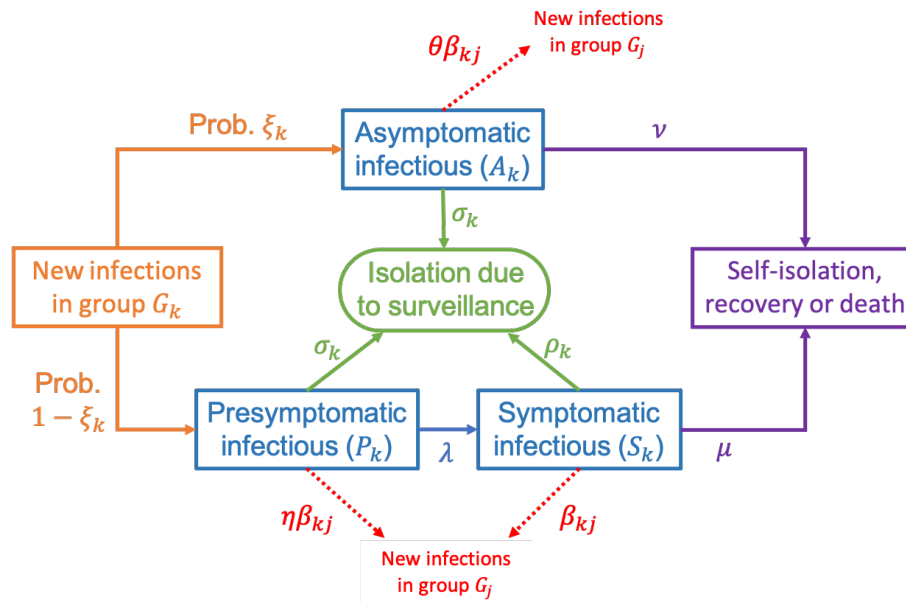

174

175 **Fig 1. The branching process model used in our analyses.** Schematic showing the different possible  
 176 events in the branching process model and the rates at which they occur. The parameters of the model  
 177 are described in the text and in Tables 1, 2 and 3.

178

## 179 2.2 Reproduction number

180 The effective reproduction number,  $R$ , represents the expected number of secondary infections  
 181 generated by a single infected individual during their entire course of infection, accounting for  
 182 interventions that are in place. Here, we take a heuristic approach to derive the following  
 183 expression for  $R$ :

$$184 \quad R = \sum_{k=1}^{16} \frac{N_k}{N} \sum_{l=1}^{16} \left[ \frac{\xi_k \theta \beta_{kl}}{\nu + \sigma_k} + (1 - \xi_k) \left( \frac{\eta \beta_{kl}}{\lambda + \sigma_k} + \frac{\lambda}{\lambda + \sigma_k} \frac{\beta_{kl}}{\mu + \rho_k} \right) \right], \quad (1)$$

185 where  $N = N_1 + \dots + N_{16}$  is the total population size. To obtain this expression, we first consider  
 186 the expected number of secondary infections an infected individual in age group  $G_k$  will generate  
 187 in age group  $G_l$ . If an individual in age group  $G_k$  experiences a fully asymptomatic course of  
 188 infection, which occurs with probability  $\xi_k$ , they will generate new infections in age group  $G_l$  at

189 rate  $\theta\beta_{kl}$  and recover or be isolated at rate  $\nu + \sigma_k$ . Therefore, the total number of infections they  
190 are expected to cause in age group  $G_l$  is  $\theta\beta_{kl}/(\nu + \sigma_k)$ . If instead the individual in age group  $G_k$   
191 experiences a symptomatic course of infection, which occurs with probability  $1 - \xi_k$ , whilst  
192 presymptomatic they will generate new infections in age group  $G_l$  at rate  $\eta\beta_{kl}$  and be isolated or  
193 develop symptoms at rate  $\lambda + \sigma_k$ . Thus, the total number of infections they are expected to cause  
194 in age group  $G_l$  whilst presymptomatic is  $\eta\beta_{kl}/(\lambda + \sigma_k)$ . If they go on to develop symptoms  
195 before being isolated, which occurs with probability  $\lambda/(\lambda + \sigma_k)$ , applying similar reasoning they  
196 are expected to cause  $\beta_{kl}/(\mu + \rho_k)$  new infections in age group  $G_l$  whilst symptomatic.  
197 Combining these possibilities leads to the term in square brackets in expression (1), which is then  
198 summed over all possible age groups  $G_l$  of the infectee. Finally, to obtain the full expression (1)  
199 we take a weighted average across all possible age groups  $G_k$  of the infector, where the weights  
200  $N_k/N$  represent the proportions of the population belonging to each age group. This corresponds  
201 to the assumption that the initial infected host is more likely to belong to an age group containing  
202 more individuals than an age group with fewer individuals.

203

204 In the absence of interventions, i.e. when  $\sigma_k = \rho_k = 0$  (representing no enhanced isolation as a  
205 result of surveillance) and  $\beta_{kl}$  is calculated using contact patterns that are characteristic of  
206 normal behaviour, the effective reproduction number,  $R$ , is equal to the basic reproduction  
207 number,  $R_0$ .

208

### 209 **2.3 Model parameterisation**

210 The numbers of individuals in each age group (values of  $N_k$ ) were chosen according to United  
211 Nations age demographic data for the UK [58] (Fig 2A). The daily numbers of contacts between

212 individuals in each age group (values of  $C_{kj}$ ) were set according to the 16x16 ‘contact matrix’  
213 for the UK, in which the  $(k, j)$ th entry represents the expected daily number of unique contacts  
214 an individual in age group  $G_k$  has with individuals in age group  $G_j$  [17]. In addition to matrices  
215 representing ‘all’ contacts (Figure 2B), we also considered matrices detailing a breakdown into  
216 ‘school’, ‘work’, ‘home’ and ‘other’ contacts (Figures 2C-F), allowing us to investigate the  
217 effects of control interventions that reduce contacts in each of these settings.

218  
219 Since we considered SARS-CoV-2 as a case study, we used studies conducted during the  
220 COVID-19 pandemic to inform the epidemiological parameters of our model. Despite previous  
221 research assessing the relationships between age and factors such as susceptibility to SARS-  
222 CoV-2 infection or the propensity to develop symptoms, there is some variation in estimated  
223 parameters between different studies. To test the robustness of our results to this uncertainty, we  
224 conducted our analyses under three different scenarios (A, B and C). In scenario A, we assumed  
225 that susceptibility to infection (values of  $\omega_k$ ) and the proportion of hosts who experience a fully  
226 asymptomatic course of infection (values of  $\xi_k$ ) are independent of age. In scenario B,  
227 susceptibility was assumed to vary with age but the proportion of asymptomatic infections is  
228 independent of age. In scenario C, we allowed both susceptibility and the asymptomatic  
229 proportion to vary with age. The values used for the parameters  $\omega_k$  and  $\xi_k$  in each of these three  
230 scenarios are shown in Table 1 (see also [31]).

231  
232 In all scenarios considered, the inherent infectivity was not assumed to be age-dependent (i.e.  
233  $\tau_k = 1$  for all values of  $k$ ). In other words, the expected infectiousness of infected hosts in  
234 different age groups was governed solely by the proportion of asymptomatic infections in that

235 age group. We chose the scaling factors  $\eta$  and  $\theta$  for the relative transmission rates from  
 236 presymptomatic and asymptomatic individuals compared to symptomatic individuals so that the  
 237 proportions of infections arising from each of these groups were in line with literature estimates  
 238 (see Table 3 and [57]).

239  
 240 In the absence of enhanced isolation, we set the expected duration of the presymptomatic  
 241 infectious period and the time for which symptomatic individuals are able to infect others to be  
 242  $1/\lambda = 2$  days and  $1/\mu = 8$  days, respectively [59-62]. The asymptomatic infectious period was  
 243 then chosen so that all infected individuals are expected to be infectious for the same period (i.e.  
 244  $1/\nu = 10$  days). In our initial analysis, we set the isolation rates  $\rho_k$  and  $\sigma_k$  equal to 0 for all  
 245  $k$ ; later, we considered the effects of increasing these rates.

246  
 247 Initially, we fixed  $R_0 = 3$  (in line with initial estimates of SARS-CoV-2 transmissibility [63-66],  
 248 before the emergence of more transmissible variants) and used expression (1) to determine the  
 249 appropriate corresponding value of the scaling factor  $B$ . Later, when considering the impact of  
 250 NPIs on the probability of a local outbreak, we retained this value of  $B$  and used expression (1)  
 251 to determine how the reproduction number changes as a result of the control implemented.

252  
 253 **Table 1. Baseline values of age-dependent parameters.** Values used for the age-dependent relative  
 254 susceptibility to infection ( $\omega_k$ ) and the proportion of infections that are asymptomatic ( $\xi_k$ ) for each of the  
 255 scenarios A, B and C [31].

| Age group ( $G_k$ ) | Relative susceptibility ( $\omega_k$ ) |                 | Asymptomatic proportion ( $\xi_k$ )   |            |
|---------------------|----------------------------------------|-----------------|---------------------------------------|------------|
|                     | Scenario A                             | Scenarios B & C | Scenarios A & B                       | Scenario C |
| $G_1, G_2$ (0-9)    | 1.0                                    | 0.4             | 0.584                                 | 0.71       |
| $G_3, G_4$ (10-19)  |                                        | 0.38            | (weighted average<br>of age-dependent | 0.79       |
| $G_5, G_6$ (20-29)  |                                        | 0.79            |                                       | 0.73       |

|                          |  |      |                                  |      |
|--------------------------|--|------|----------------------------------|------|
| $G_7, G_8$ (30-39)       |  | 0.86 | values of $\xi_k$ in scenario C) | 0.67 |
| $G_9, G_{10}$ (40-49)    |  | 0.8  |                                  | 0.6  |
| $G_{11}, G_{12}$ (50-59) |  | 0.82 |                                  | 0.51 |
| $G_{13}, G_{14}$ (60-69) |  | 0.88 |                                  | 0.37 |
| $G_{15}, G_{16}$ (70+)   |  | 0.74 |                                  | 0.31 |

256

257 **Table 2. Baseline values of scenario-independent parameters.** Values used for the parameters that were  
 258 assumed not to vary between scenarios A, B and C. We also considered strategies involving enhanced  
 259 surveillance ( $\rho_k, \sigma_k > 0$ ) – see Fig 6.

| Parameter  | Meaning                                                                                                       | Baseline value                        | Justification                                                                                                                                                                   |
|------------|---------------------------------------------------------------------------------------------------------------|---------------------------------------|---------------------------------------------------------------------------------------------------------------------------------------------------------------------------------|
| $R_0$      | Expected number of secondary infections generated by a single infectious host in the absence of interventions | $R_0 = 3$                             | Within estimated range for original SARS-CoV-2 virus [63-66]                                                                                                                    |
| $\lambda$  | Rate at which presymptomatic hosts develop symptoms                                                           | $\lambda = 1/2 \text{ days}^{-1}$     | [59]                                                                                                                                                                            |
| $\mu$      | Rate at which symptomatic hosts are removed due to self-isolation, recovery or death                          | $\mu = 1/8 \text{ days}^{-1}$         | [60-62]                                                                                                                                                                         |
| $\nu$      | Rate at which asymptomatic hosts are removed due to recovery or death                                         | $\nu = 1/10 \text{ days}^{-1}$        | Chosen so that, in the absence of interventions, the expected duration of infection is identical for all infected hosts ( $\frac{1}{\nu} = \frac{1}{\lambda} + \frac{1}{\mu}$ ) |
| $\tau_k$   | (Relative) infectivity parameter                                                                              | $\tau_k = 1$ for $k = 1, \dots, 16$   | Assumed                                                                                                                                                                         |
| $\rho_k$   | Isolation rate due to surveillance of symptomatic individuals                                                 | $\rho_k = 0$ for $k = 1, \dots, 16$   | N/A                                                                                                                                                                             |
| $\sigma_k$ | Isolation rate due to surveillance of nonsymptomatic individuals                                              | $\sigma_k = 0$ for $k = 1, \dots, 16$ | N/A                                                                                                                                                                             |

260

261 **Table 3. Baseline values of scenario-dependent scaling parameters.** Values used for the scaling parameters  
 262  $B, \eta$  and  $\theta$  for each of the scenarios A, B and C.

| Parameter | Meaning                                                                          | Value      |            |            | Justification                                                                                   |
|-----------|----------------------------------------------------------------------------------|------------|------------|------------|-------------------------------------------------------------------------------------------------|
|           |                                                                                  | Scenario A | Scenario B | Scenario C |                                                                                                 |
| $B$       | Transmission rate scaling factor                                                 | 0.0386     | 0.0559     | 0.0607     | Chosen so that $R_0 = 3$ [63-66]                                                                |
| $\eta$    | Relative transmission rate of presymptomatic hosts compared to symptomatic hosts | 4.83       | 4.83       | 4.83       | Chosen so that the proportion of all infections arising from presymptomatic hosts is 0.489 [57] |

|          |                                                                                |       |       |       |                                                                                                        |
|----------|--------------------------------------------------------------------------------|-------|-------|-------|--------------------------------------------------------------------------------------------------------|
| $\theta$ | Relative transmission rate of asymptomatic hosts compared to symptomatic hosts | 0.149 | 0.149 | 0.130 | Chosen so that the proportion of all infections arising from entirely asymptomatic hosts is 0.106 [57] |
|----------|--------------------------------------------------------------------------------|-------|-------|-------|--------------------------------------------------------------------------------------------------------|

263

## 264 **2.4 Probability of a local outbreak**

265 The probability that an infected individual in a particular age group initiates a local outbreak

266 when they are introduced into the population was calculated using the branching process model.

267 One possible approach for approximating the age-dependent local outbreak probability using a

268 branching process model is to run a large number of stochastic simulations of the model starting

269 from a single infected individual in a particular age group, and record the proportion of

270 simulations in which the pathogen does not fade out after only a small number of infections [67].

271 This would then need to be repeated for index cases of different ages. Here, we instead take an

272 analytic approach, and derive a nonlinear system of simultaneous equations that determine the

273 age-dependent outbreak probabilities, as described below. The local outbreak probabilities are

274 then obtained by solving these equations numerically, and are analogous to the probabilities that

275 would be derived from the simulation approach in the limit of infinitely many simulations. The

276 benefit of our analytic approach is that it does not require a large number of stochastic

277 simulations to be run.

278

279 The probability of a local outbreak not occurring (i.e. pathogen fadeout occurs), starting from a

280 single symptomatic (or presymptomatic, asymptomatic respectively) infectious individual in age

281 group  $G_k$ , was denoted by  $x_k$  ( $y_k, z_k$ ). Beginning with a single symptomatic individual in  $G_k$ ,

282 the possibilities for the next event are as follows:

283 1. The infected individual in  $G_k$  infects a susceptible individual in  $G_j$ , so that either  $A_j$   
284 increases by one (with probability  $\xi_j$ ) or  $P_j$  increases by one (with probability  $(1 - \xi_j)$ ).

285 This occurs with probability

$$286 \alpha_{kj} = \frac{\beta_{kj}}{\mu + \rho_k + \sum_{l=1}^{16} \beta_{kl}}.$$

287 2. The infected individual in  $G_k$  recovers, dies or is isolated before infecting anyone else, so  
288 that  $S_k$  decreases to zero (and there are no infected individuals left in the population).

289 This occurs with probability

$$290 \gamma_k = \frac{\mu + \rho_k}{\mu + \rho_k + \sum_{l=1}^{16} \beta_{kl}}.$$

291 If there are no infectious hosts present in the population, then a local outbreak will not occur.

292 Therefore, assuming that chains of transmission arising from infectious individuals are  
293 independent, the probability that no local outbreak occurs beginning from a single symptomatic  
294 individual in  $G_k$  is

$$295 x_k = x_k \left[ \sum_{j=1}^{16} \alpha_{kj} (\xi_j z_j + (1 - \xi_j) y_j) \right] + \gamma_k. \quad (2)$$

296 Similarly, beginning instead with a single presymptomatic individual in  $G_k$ , the possibilities for  
297 the next event are:

298 1. The presymptomatic infected individual in  $G_k$  infects a susceptible individual in  $G_j$ , so  
299 that (as before) either  $A_j$  increases by one (with probability  $\xi_j$ ) or  $P_j$  increases by one  
300 (with probability  $(1 - \xi_j)$ ). This occurs with probability

$$301 \tilde{\alpha}_{kj} = \frac{\eta \beta_{kj}}{\lambda + \sigma_k + \eta \sum_{l=1}^{16} \beta_{kl}}.$$

302 2. The infected individual in  $G_k$  develops symptoms (transitions from  $P_k$  to  $S_k$ ). This occurs  
 303 with probability

$$304 \quad \delta_k = \frac{\lambda}{\lambda + \sigma_k + \eta \sum_{l=1}^{16} \beta_{kl}}.$$

305 3. The infected individual in  $G_k$  is isolated before infecting anyone else, so that  $S_k$  decreases  
 306 by one. This occurs with probability

$$307 \quad \phi_k = \frac{\sigma_k}{\lambda + \sigma_k + \eta \sum_{l=1}^{16} \beta_{kl}}.$$

308 Therefore, the probability that no local outbreak occurs beginning from a single presymptomatic  
 309 individual in  $G_k$  is

$$310 \quad y_k = y_k \left[ \sum_{j=1}^{16} \tilde{\alpha}_{kj} (\xi_j z_j + (1 - \xi_j) y_j) \right] + \delta_k x_k + \phi_k. \quad (3)$$

311 Similarly, the probability  $z_k$  that a local outbreak does not occur starting from a single  
 312 asymptomatic individual in  $G_k$  satisfies the equation

$$313 \quad z_k = z_k \left[ \sum_{j=1}^{16} \hat{\alpha}_{kj} (\xi_j z_j + (1 - \xi_j) y_j) \right] + \epsilon_k, \quad (4)$$

314 where

$$315 \quad \hat{\alpha}_{kj} = \frac{\theta \beta_{kj}}{\nu + \sigma_k + \theta \sum_{l=1}^{16} \beta_{kl}} \quad \text{and} \quad \epsilon_k = \frac{\nu + \sigma_k}{\nu + \sigma_k + \theta \sum_{l=1}^{16} \beta_{kl}}.$$

316  
 317 The system of simultaneous equations (2) – (4) can be solved numerically to obtain  $x_k, y_k$  and  
 318  $z_k$  (here, we did this using the MATLAB nonlinear system solver *fsolve*). Specifically, we take  
 319 the minimal non-negative solution, as is standard when calculating extinction probabilities using  
 320 branching process models [55, 68]. Then, for each  $k$ , the probability of a local outbreak



321 occurring beginning from a single symptomatic (or presymptomatic, asymptomatic respectively)  
322 individual in group  $G_k$  is given by  $1 - x_k(1 - y_k, 1 - z_k)$ .

323  
324 Throughout, we consider the probability  $p_k$  of a local outbreak occurring beginning from a single  
325 nonsymptomatic individual in group  $G_k$  arriving in the population at the beginning of their  
326 infection:

$$327 \quad p_k = \xi_k(1 - z_k) + (1 - \xi_k)(1 - y_k).$$

328  
329 The average local outbreak probability,  $P$ , which is defined as the probability of a local outbreak  
330 when the index case is chosen randomly from the population, is also considered. The value of  $P$   
331 is therefore a weighted average of the  $p_k$  values, where the weights correspond to the proportion  
332 of the population represented by each group:

$$333 \quad P = \frac{1}{N} \sum_{k=1}^{16} N_k p_k.$$

334 This reflects an assumption that the index case is more likely to come from an age group with  
335 more individuals than an age group with fewer individuals.

336  
337 All computing code used to implement the above methods was written in MATLAB version  
338 R2019a, and is available at <https://github.com/francescalovellread/age-dependent-outbreak-risks>.

339

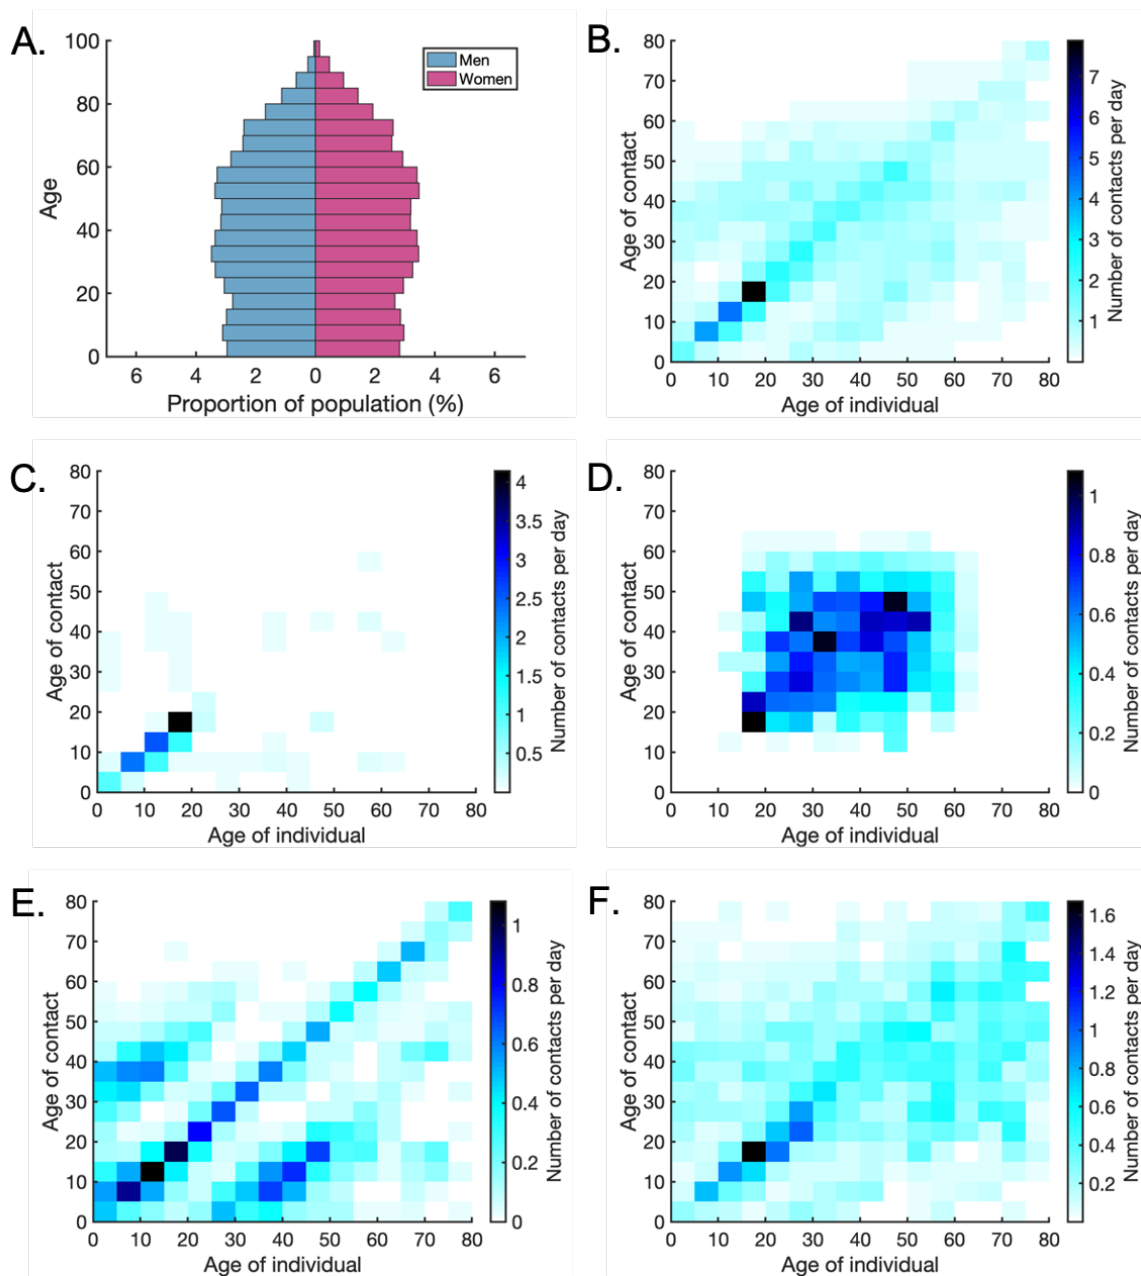

340

341 **Fig 2. Age demographic and age-structured contact patterns for the United Kingdom. A.**

342 United Nations age demographic data for the UK in 2020, split into five-year age groups (where the  
343 final age group contains all ages 75+) [58]. B. Heat map of UK ‘all contacts’ matrix, representing the  
344 expected daily number of unique contacts that an individual in each age group  $G_k$  has with  
345 individuals in each other age group  $G_j$  [17]. C. The analogous figure to B, but showing only the  
346 subset of ‘all’ contacts that occur in schools (‘school’ contacts). D. The analogous figure to C, but

347 showing only ‘workplace’ contacts. E. The analogous figure to C, but showing only ‘home’ contacts.  
348 F. The analogous figure to C, but showing only ‘other’ contacts (i.e. all contacts outside schools,  
349 workplaces or homes).

350

### 351 **3. Results**

#### 352 **3.1 Effect of the age of the index case on the risk of a local outbreak**

353 We first considered the probability that a single infected individual in a particular age group  $G_k$   
354 initiates a local outbreak when introduced into a new host population. This quantity was  
355 calculated for each of the three scenarios A, B and C (Fig 3).

356

357 In scenario A, the variation in the local outbreak risk for introduced cases of different ages is  
358 driven solely by the numbers of contacts between individuals. As a result, due to their higher  
359 numbers of daily contacts, school- and working-age individuals are more likely to trigger a local  
360 outbreak than children under five or adults over 60, with index cases aged 15-19 posing the  
361 highest risk (Fig 3A). These findings do not change significantly when susceptibility is allowed  
362 to vary with age in scenario B (Fig 3B). However, in scenario C, assuming that the clinical  
363 fraction also varies between age groups alters the age-dependent risk profile substantially. This is  
364 because asymptomatic individuals are assumed to be less infectious than symptomatic  
365 individuals, and therefore an index case in an age group with a high proportion of asymptomatic  
366 infections is less likely to initiate a local outbreak. In this scenario, index cases aged 40 or over  
367 had a disproportionately high probability of generating a local outbreak, with individuals aged  
368 70-74 presenting the highest risk (Fig 3C). These individuals are more likely to develop  
369 symptoms than younger individuals (Table 1), leading to a higher expected infectiousness. In  
370 contrast, individuals under the age of 40 had a below average probability of generating a local

371 outbreak, with individuals aged 10-14 presenting the lowest risk. Noticeably, individuals aged 5-  
372 19 presented relatively low risks, despite the high numbers of contacts occurring among these  
373 age groups (Fig 2B). In this scenario, the large number of contacts was offset by the fact that  
374 individuals in these age groups are more likely to be asymptomatic and consequently less  
375 infectious than older individuals (Table 1). Therefore, an index case in one of these age groups is  
376 likely to lead to fewer secondary transmissions. Furthermore, the contact patterns between  
377 individuals in these age groups are highly assortative with respect to age (Fig 2B). Therefore, in  
378 addition to the index case being less infectious, a high proportion of the contacts they make are  
379 with individuals who are also likely to be less infectious, as well as being less susceptible to  
380 infection in the first place.

381  
382 We performed our subsequent analyses for each of the three scenarios A, B and C, with  
383 qualitatively similar results. The figures shown in the main text are for scenario C, since we  
384 deem this scenario to be the most realistic for SARS-CoV-2 transmission, but the analogous  
385 results for scenarios A and B are presented in Supplementary Figs S1-6.

386

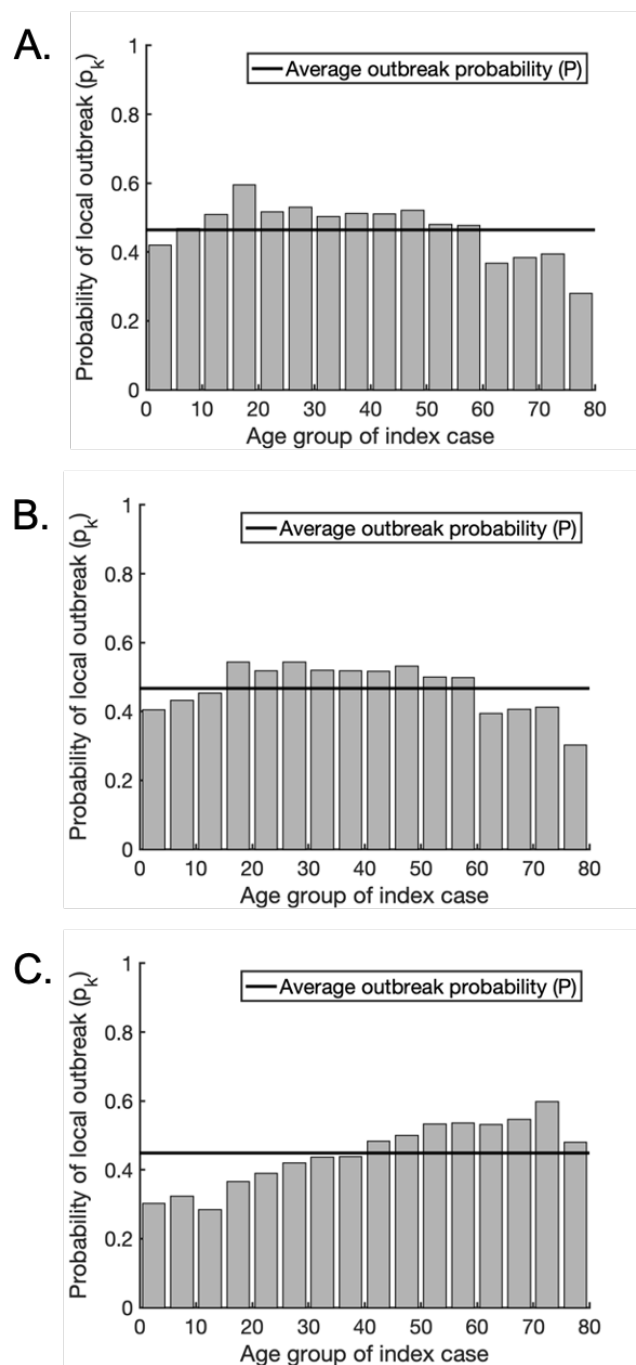

387

388

389

390

391

392

**Fig 3. The probability of a local outbreak depends on the age of the index case.** A. The probability that a single infected individual in any given age group triggers a local outbreak (grey bars) for scenario A, in which susceptibility and clinical fraction are assumed constant across all age groups. The weighted average local outbreak probability  $P$  is shown by the black horizontal line. B. The analogous figure to A but for scenario B, in which clinical fraction is assumed constant across

393 all age groups but susceptibility varies with age (Table 1). C. The analogous figure to A but for  
394 scenario C, in which both susceptibility and clinical fraction vary with age (Table 1).

395

### 396 **3.2 Effect of the target age group on NPI effectiveness**

397 We next considered the effects of NPIs that reduce the number of contacts between individuals  
398 on the probability that an introduced case will lead to a local outbreak. To approximate the  
399 relative effects of school closures, workplace closures and population-wide social distancing  
400 policies, we calculated the age-dependent risk profiles when each of these types of contact were  
401 excluded from the overall contact matrix.

402

403 First, we removed all ‘school’ contacts from the total contact matrix (Fig 4A). For scenario C,  
404 removing ‘school’ contacts led to a 4.2% reduction in the average probability of a local outbreak  
405 (from 0.449 to 0.430). This small reduction is unsurprising for scenario C, since in that scenario  
406 school-aged infected individuals are assumed to be more likely to be asymptomatic than other  
407 infected individuals, and therefore their expected infectiousness is lower. However, even for  
408 scenarios A and B, in which school-aged individuals present the greatest risk of triggering a local  
409 outbreak, the effectiveness of removing ‘school’ contacts alone at reducing the local outbreak  
410 probability was limited (reductions of 7.2% and 4.75% respectively; see Supplementary Figs  
411 S1A, S4A). In each scenario, the reduction in risk was predominantly for school-aged index  
412 cases, with the risk from index cases of other ages only slightly reduced. Second, we considered  
413 the effects of removing ‘work’ contacts from the total contact matrix (Fig 4B). This led to a more  
414 substantial 25.4% reduction in the average probability of a local outbreak for scenario C (with  
415 corresponding reductions of 19.0% and 24.0% for scenarios A and B respectively; see  
416 Supplementary Figs S1B, S4B). As well as reducing the risk of a local outbreak from an index

417 case of working age, removing ‘work’ contacts also reduced the probability of a local outbreak  
418 occurring starting from a school-aged individual. This is because closing workplaces helps to  
419 block chains of transmission that begin with an infected child. For example, a transmission chain  
420 involving a child transmitting to an adult at home, followed by subsequent spread around the  
421 adult’s workplace, will be less likely to occur. Third, we investigated the effect of removing all  
422 ‘other’ contacts, reflecting perfect social distancing being observed outside of the home, school  
423 or workplace (Fig 4C). This had the most significant effect of the three types of contact-reducing  
424 intervention considered, reducing the probability of a local outbreak by 41.7% for scenario C  
425 (and 30.7% or 33.2% for scenarios A and B, respectively).

426  
427 In the three cases described above, we considered complete reductions in ‘school’, ‘work’ and  
428 ‘other’ contacts, respectively. In practice, such complete elimination of contacts is unlikely. We  
429 therefore also considered partial reductions in ‘school’, ‘work’ and ‘other’ contacts, and  
430 compared the resulting reductions in the local outbreak probability (Fig 4D). For any given  
431 percentage reduction in contacts, reducing ‘other’ contacts always led to the largest reduction in  
432 the local outbreak probability (see also Supplementary Figs S1D, S4D). This suggests that  
433 reducing social contacts outside schools and workplaces can be an important component of  
434 strategies to reduce the risk of local outbreaks of SARS-CoV-2. However, this alone is not  
435 enough to eliminate the risk of local outbreaks entirely. For greater risk reductions using contact-  
436 reducing NPIs, a mixed approach involving combinations of reductions in ‘school’, ‘workplace’  
437 and ‘other’ contacts is needed.

438

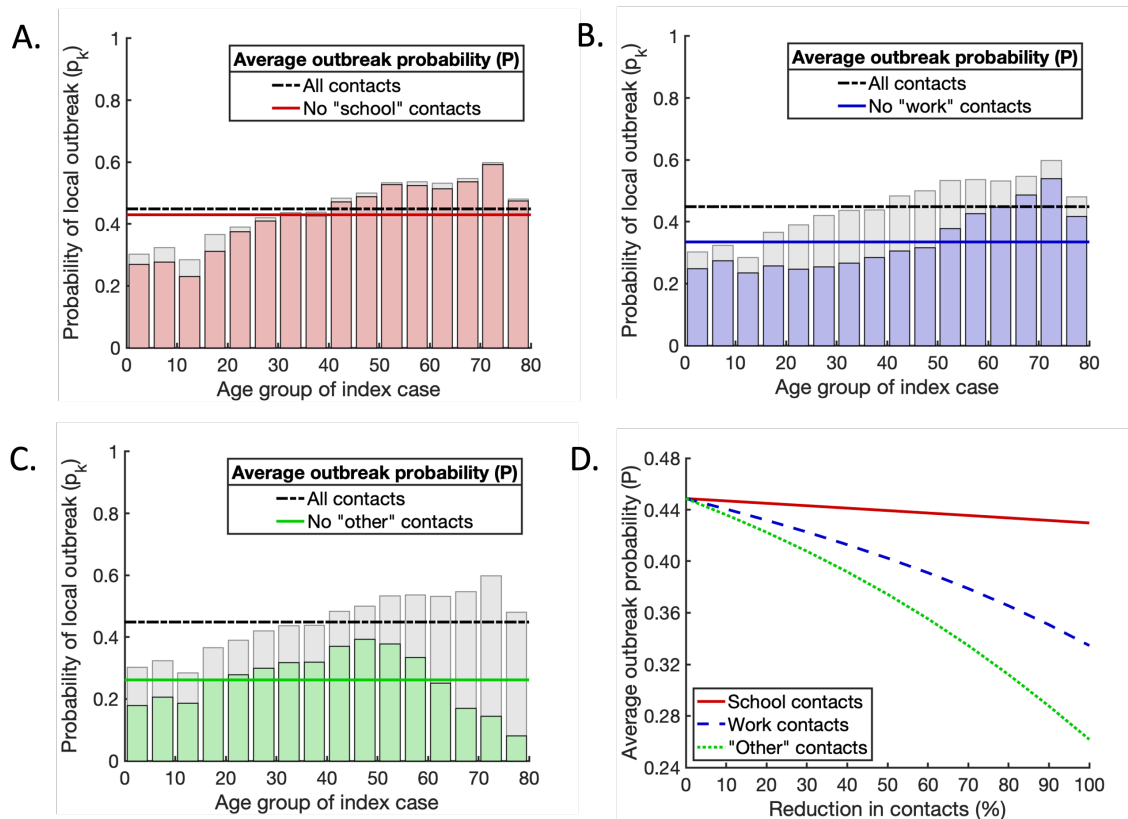

439

440

441

442

443

444

445

446

447

448

### 449 3.3 Mixed strategies for reducing the local outbreak risk

450 Next, we considered the effects of combining reductions in 'school', 'work' and 'other' contacts

451 on the local outbreak probability (Fig 5; analogous results for scenarios A and B are shown in

452 Supplementary Figs S2 and S5). We allowed reductions in 'school' and 'work' contacts to vary



453 between 0% and 100% whilst ‘other’ contacts were reduced by 25%, 50% or 75% (Fig 5A,B,C,  
454 respectively).

455

456 Since NPIs have negative economic, social and non-disease health consequences, policy makers  
457 may choose to implement public health measures in which the risk of local outbreaks is not  
458 eliminated completely. These results provide contact reduction targets for mixed strategies in  
459 which the local outbreak probability is reduced to a pre-specified ‘acceptable’ level. For  
460 example, to reduce the local outbreak probability to 0.25, ‘other’ contacts could be reduced by  
461 25% from the baseline level, and ‘school’ and ‘home’ contacts reduced as indicated by the red  
462 dotted contour marked ‘0.25’ in Fig 5A. Alternatively, to achieve the same local outbreak risk,  
463 ‘other’ contacts can instead be reduced by 50% or by 75% with the degree of ‘school’ and  
464 ‘work’ reductions chosen according to the contours marked ‘0.25’ in Figs 5B,C respectively.

465

466 If a policy maker wishes to eliminate the local outbreak risk entirely using contact-reducing  
467 NPIs, for the model parameterisation considered very significant reductions in multiple types of  
468 contacts are needed in combination. For example, even if all ‘school’ and ‘work’ contacts are  
469 removed, ‘other’ contacts must be reduced by 66% for the overall average local outbreak  
470 probability to fall below 0.01 (Fig 5D). Since such substantial reductions in multiple types of  
471 contacts are unlikely to be possible, this suggests that contact-reducing NPIs must be combined  
472 with other interventions, such as effective surveillance and isolation strategies, to eliminate local  
473 outbreaks.

474

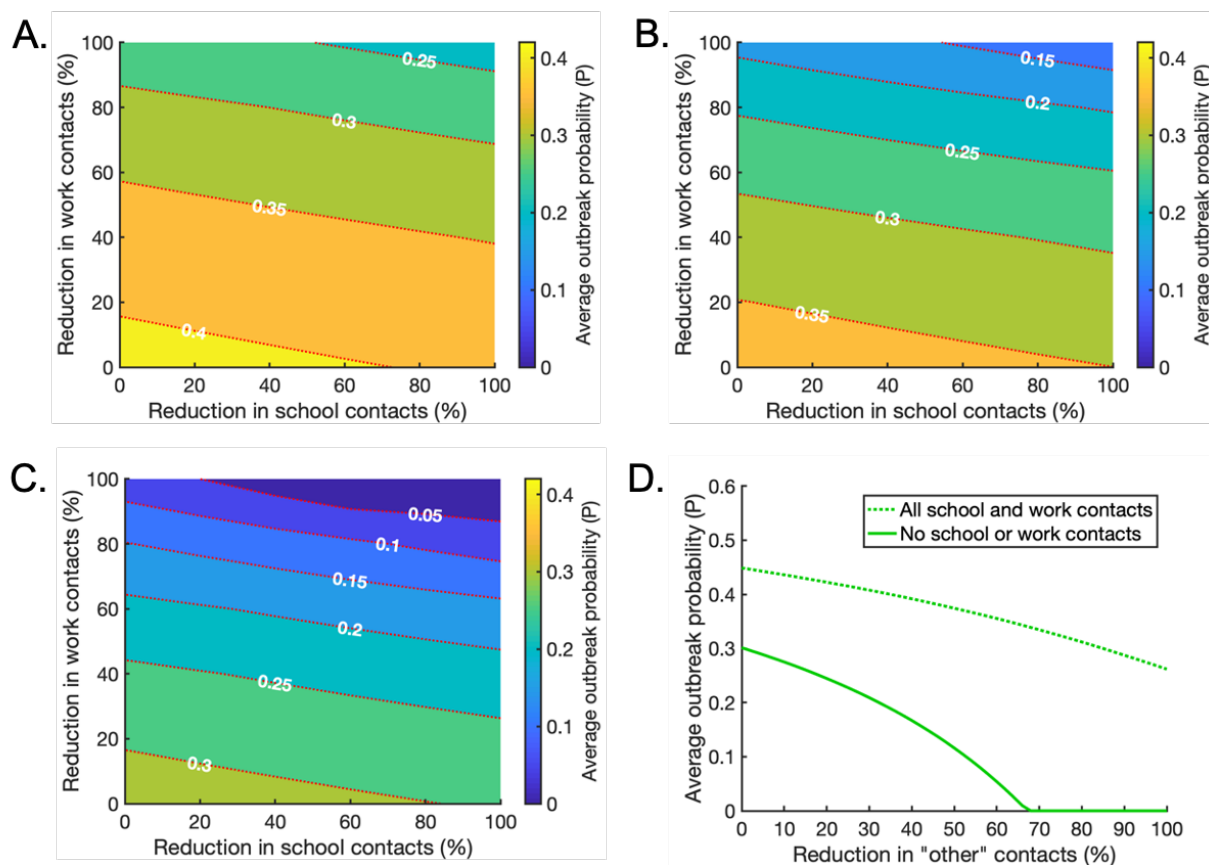

475

476

477

478

479

480

481

482

483

484

### 485 3.4 Effect of surveillance on the contact-reducing NPIs required for local outbreak control

486 We considered whether or not low local outbreak probabilities can be achieved using limited

487 contact-reducing NPIs in combination with other interventions. Specifically, the effects of

488 surveillance and isolation of infected individuals (through e.g. contact tracing) as well as  
489 reducing contacts in schools, workplaces and other locations, were assessed. While results are  
490 shown for scenario C in Fig 6, analogous results for scenarios A and B are presented in  
491 Supplementary Figs S3 and S6.

492

493 Initially, we considered the effect of increasing the rate at which symptomatic and/or  
494 nonsymptomatic infected individuals are detected and isolated as a result of surveillance, in the  
495 absence of contact-reducing NPIs (i.e. with no reduction in the number of contacts between  
496 individuals compared to the baseline case in Fig 2B) (Fig 6A,B). For symptomatic hosts, this  
497 represents an enhanced rate of isolation compared to the baseline rate of self-isolation already  
498 present in the model. Isolation of nonsymptomatic hosts was more effective at reducing the local  
499 outbreak probability than isolation of symptomatic hosts (Figs 6A,B), although of course this is  
500 more challenging to achieve [55]. However, if fast isolation of nonsymptomatic hosts could be  
501 achieved through efficient large-scale testing (potentially in combination with contact tracing  
502 [69]), the probability of local outbreaks could be reduced substantially through this measure  
503 alone.

504

505 We then demonstrated the effects of combining contact-reducing NPIs with enhanced isolation  
506 of infected hosts due to infection surveillance. First, we increased the enhanced isolation rate of  
507 symptomatic individuals to  $\rho_k = 1/2 \text{ days}^{-1}$ . In the absence of other interventions, this reduced  
508 the local outbreak probability by 22.0% (Figure 6C). With this level of surveillance, the local  
509 outbreak risk could be reduced below 0.01 with a reduction in ‘work’ and ‘other’ contacts of  
510 around 73% each, for example.

511  
512 Finally, keeping the enhanced isolation rate of symptomatic individuals equal to  $\rho_k =$   
513  $1/2 \text{ days}^{-1}$ , we increased the isolation rate of nonsymptomatic individuals to  $\sigma_k = 1/7 \text{ days}^{-1}$ .  
514 In this case, the local outbreak probability without contact-reducing NPIs fell by 59.4%  
515 compared to a situation without enhanced surveillance (Fig 6E), and the reductions in ‘work’ and  
516 ‘other’ contacts needed to bring the local outbreak probability below 0.01 were significantly  
517 smaller (Figure 6F). For example, if ‘work’ contacts can be reduced by 50%, then ‘other’  
518 contacts only need to be reduced by 43%. This indicates that effective surveillance of both  
519 symptomatic and nonsymptomatic individuals can substantially lower the extent of contact-  
520 reducing NPIs that are required to achieve substantial reductions in local outbreak risks.

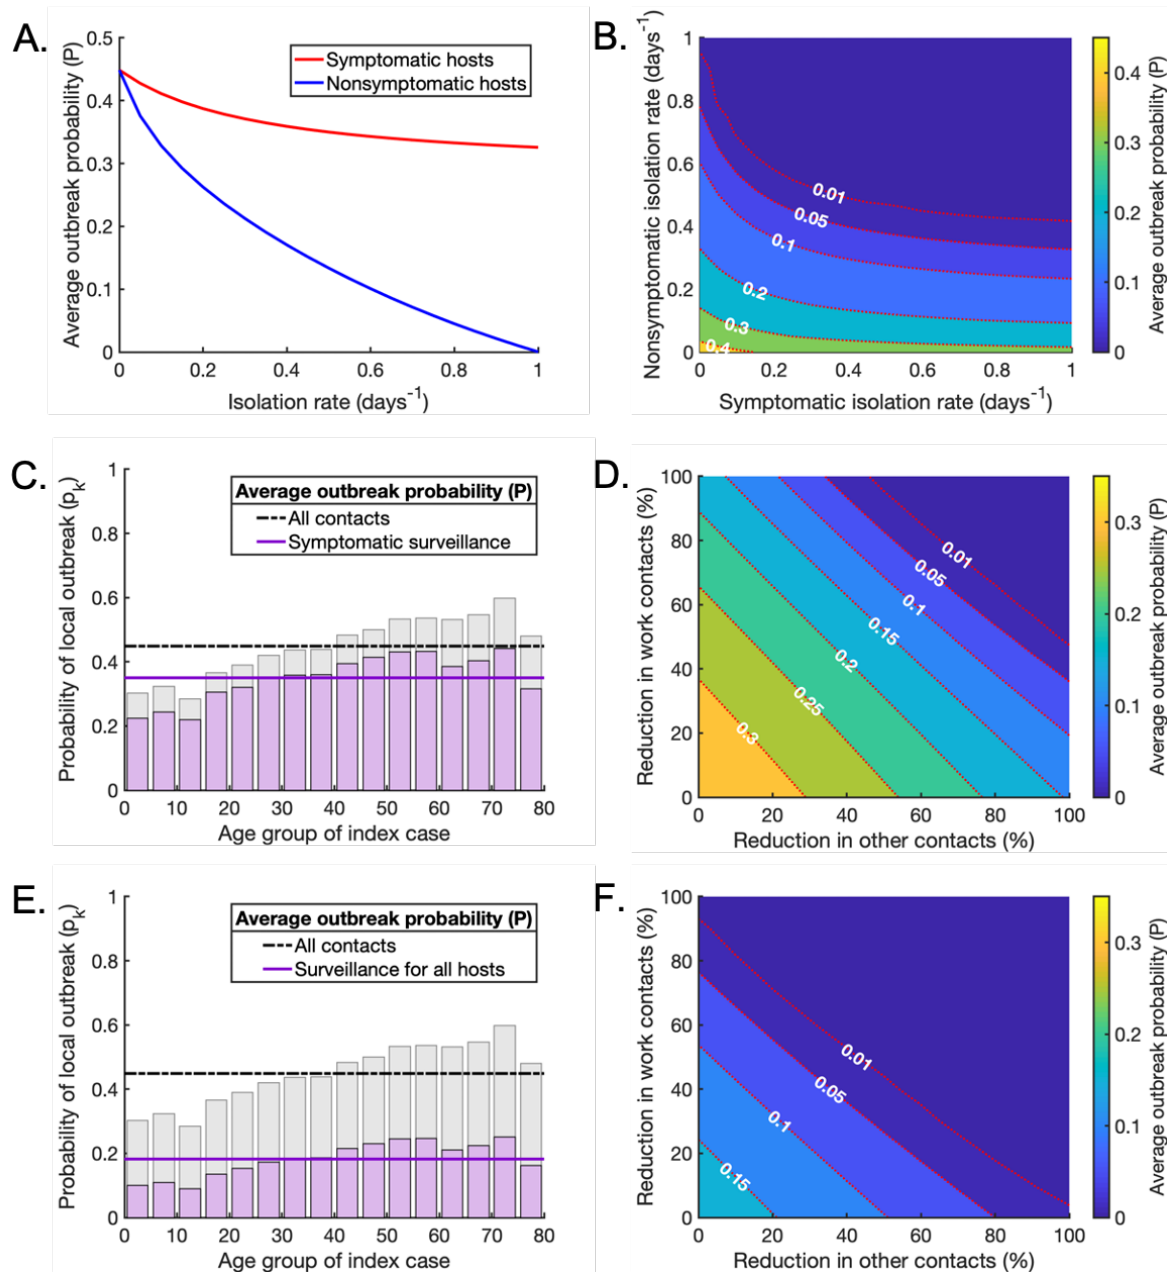

521

522

523

524

525

526

527

**Fig 6. Surveillance as part of a mixed strategy to reduce the local outbreak probability.** A. The effect of increasing the isolation rate of symptomatic (red line) or nonsymptomatic infected hosts (blue line) on the average probability of a local outbreak ( $P$ ), in the absence of contact-reducing NPIs. The isolation rates  $\rho_k$  and  $\sigma_k$  are varied in turn between 0  $\text{days}^{-1}$  and 1  $\text{days}^{-1}$ . B. The effect of simultaneously varying the isolation rate of symptomatic and nonsymptomatic hosts on the average probability of a local outbreak ( $P$ ), again without contact-reducing NPIs. C. The age-dependent

528 probability of a local outbreak when the isolation rate of symptomatic individuals is  $\rho_k = 1/2 \text{ days}^{-1}$ ,  
529 without contact-reducing NPIs or surveillance of nonsymptomatic infected individuals (purple bars and  
530 solid line). Pale grey bars and black dash-dotted line represent the original local outbreak probabilities  
531 without any contact-reducing NPIs or enhanced surveillance (as in Fig 3C). D. The effect of reducing  
532 ‘work’ and ‘other’ contacts when the isolation rate of symptomatic infected individuals is  $\rho_k =$   
533  $1/2 \text{ days}^{-1}$ , as in C, without surveillance of nonsymptomatic infected individuals. E,F. The analogous  
534 figures to C,D, with enhanced surveillance of both symptomatic and nonsymptomatic infected hosts  
535 ( $\rho_k = 1/2 \text{ days}^{-1}$  and  $\sigma_k = 1/7 \text{ days}^{-1}$ ).

536

#### 537 **4. Discussion**

538 During the COVID-19 pandemic, public health measures that reduce the numbers of contacts  
539 between individuals have been implemented in countries globally. These measures include  
540 school closures, workplace closures and population-wide social distancing policies. Contact-  
541 reducing NPIs have been shown to be effective at reducing SARS-CoV-2 transmission, and have  
542 also been used previously during influenza pandemics [5, 70-72]. However, long-term  
543 implementation of these measures has negative social, psychological and economic  
544 consequences [7, 12-16]. It is therefore important to assess the effectiveness of different contact-  
545 reducing NPIs at lowering transmission and preventing local outbreaks, in order to design  
546 effective targeted control strategies that avoid unnecessarily strict measures.

547

548 Here, we constructed a branching process model to estimate the risk of local outbreaks under  
549 different contact-reducing NPIs and different levels of surveillance for symptomatic and  
550 nonsymptomatic infected individuals. Unlike previous approaches for estimating outbreak risks  
551 using branching processes [51-56], we considered the effects of age-related heterogeneities

552 affecting transmission for infected individuals of a wide range of ages, including age-dependent  
553 variations in social mixing patterns, susceptibility to infection and clinical fraction. Using SARS-  
554 CoV-2 as a case study, we demonstrated that the risk that an introduced case initiates a local  
555 outbreak depends on these age-related factors and on the age of the introduced case (Fig 3), as  
556 well as the age-structure of the local population.

557  
558 We used our model to assess the effects of reducing the numbers of contacts that occur in school,  
559 in the workplace and elsewhere. Of the three contact-reducing NPIs considered, removing  
560 ‘school’ contacts had the smallest effect on the probability of observing a local outbreak, even  
561 when age-dependent variations in susceptibility and clinical fraction were ignored (Figs 4A,D,  
562 Supplementary Figs S1A,D, and S4,A,D). This can be attributed to the fact that school closures  
563 predominantly reduce contacts between individuals aged 5-19, who only account for  
564 approximately 23% of the total population [58]. Additionally, these individuals tend to have  
565 large numbers of contacts outside of the school environment (Figs 2E,F). Therefore, compared to  
566 other measures, interrupting within-school transmission may have only a limited effect on  
567 transmission in the wider population, particularly when school-aged individuals are less  
568 susceptible to infection and more likely to experience subclinical courses of infection. In  
569 contrast, reducing contacts that occur outside schools or workplaces was the most effective  
570 intervention, significantly lowering the local outbreak risk across all age groups, and for those  
571 aged over 60 in particular (Figs 4C,D, and Supplementary Figs S1C,D and S4C,D). This could  
572 explain the success of social distancing strategies worldwide for reducing observed COVID-19  
573 cases and deaths.

574

575 Mixed strategies combining reductions in ‘school’, ‘work’ and ‘other’ contacts led to greater  
576 reductions in the local outbreak probability than individual interventions (Figs 5A-C), but very  
577 large reductions in all three types of contact were required to eliminate the risk of local outbreaks  
578 entirely (Fig 5D). However, implementing effective surveillance to identify infected hosts  
579 (followed by isolation) led to substantial reductions in the risk of local outbreaks even in the  
580 absence of other control measures (Figs 6A,B). In the scenarios considered here, with an  
581 efficient surveillance strategy in place, significantly smaller reductions in ‘work’ and ‘other’  
582 contacts were needed to render the local outbreak probability negligible, even when ‘school’  
583 contacts were not reduced at all (Figs 6C-F). This supports the use of surveillance that targets  
584 both symptomatic and nonsymptomatic individuals, such as contact tracing and isolation  
585 strategies or population-wide diagnostic testing, to help prevent local outbreaks [55].

586  
587 Although here we used SARS-CoV-2 as a case study, our model provides a framework for  
588 estimating the risk of local outbreaks in age-structured populations that can be adapted for other  
589 pathogens, provided sufficient data are available to parametrise the model appropriately. The  
590 effects of age-structure on local outbreak risks may vary for pathogens with different  
591 epidemiological characteristics. For influenza-A viruses, for example, susceptibility to infection  
592 tends to decrease with age, whilst the risk of an infection leading to severe symptoms is greater  
593 both for the elderly and for the very young [31, 73, 74]. This is in contrast to SARS-CoV-2, for  
594 which children are more likely to experience subclinical courses of infection. In this study, we  
595 used age demographic and contact data for the UK, but equivalent data for other countries are  
596 available and can easily be substituted into our model to estimate outbreak risks elsewhere [17,  
597 58].



598

599 One caveat of the results for SARS-CoV-2 presented here is that, although the epidemiological  
600 parameters of our model were chosen to be consistent with reported literature estimates, there is  
601 considerable variation between studies. In particular, the precise age-dependent variation in  
602 susceptibility and clinical fraction remains unclear, and the relative infectiousness of  
603 asymptomatic, presymptomatic and symptomatic hosts has not been determined exactly.  
604 Furthermore, the inherent transmissibility of SARS-CoV-2 is now higher than in the initial stage  
605 of the pandemic, due to the appearance of novel variants. To explore ongoing local outbreak  
606 risks due to SARS-CoV-2, it would be necessary to update the model to reflect the increased  
607 transmissibility of the Delta variant [75]. Due to the uncertainty in model parameter values, we  
608 conducted sensitivity analyses to explore the effects of varying the parameters of the model on  
609 our results (Supplementary Figs S1-12). In each case that we considered, our main conclusions  
610 were unchanged: the probability that an introduced case initiates a local outbreak depends on  
611 age-dependent factors affecting pathogen transmission and control, with widespread  
612 interventions and combinations of NPIs reducing the risk of local outbreaks most significantly.  
613

614 An important limitation of our approach to modelling contact-reducing NPIs is that we made a  
615 standard assumption in our main analyses that ‘school’, ‘work’ and ‘other’ contacts are  
616 independent [27, 31, 47]. In other words, reducing the numbers of contacts in one location did  
617 not affect the numbers of contacts occurring in another. In reality, this is unlikely to be the case.  
618 For example, closing schools also affects workplace contacts, as adults may then work from  
619 home in order to fulfil childcare requirements. Additionally, the contact data that we used  
620 represent the number of unique contacts per day and do not reflect the numbers of repeated

621 contacts with the same person, which affect the risk of transmission between individuals. These  
622 assumptions could in principle be removed, if relevant data become available – for example, data  
623 describing the effects of school closures on numbers of contacts in other locations. To  
624 demonstrate how changes in multiple types of contact due to NPIs could be implemented in the  
625 model, we conducted a supplementary analysis in which we investigated the effects of removing  
626 all ‘school’ contacts and allowing for concurrent changes in ‘work’, ‘home’ and ‘other’ contacts  
627 (Supplementary Figs S13-14). These results support our conclusion that school closures are  
628 unlikely to have a substantial impact on SARS-CoV-2 transmission when applied as the sole  
629 NPI. The benefit of school closures could even potentially be outweighed by the possible  
630 secondary effects on other types of contacts. An improved understanding of how NPIs affect  
631 different types of contact is important for more accurate assessments of interventions in future.

632  
633 Despite the simplifications made, our model provides a useful framework for estimating the risk  
634 of local outbreaks and the effects of NPIs. Different measures can be considered in combination  
635 in the model to develop strategies for lowering local outbreak risks. Our results emphasise the  
636 importance of quantifying age-dependent factors that affect transmission dynamics, such as  
637 susceptibility to infection and the proportion of hosts who develop clinical symptoms, for  
638 individuals of different ages. As we have shown, it is crucial to take age-dependent factors into  
639 account when assessing local outbreak risks and designing public health measures.

640

## 641 **Declaration of interests**

642 We declare no competing interests.

643

## 644 **Authors' contributions**

645 Conceptualisation: All authors. Methodology: FALR, RNT. Investigation: FALR, SS.

646 Writing - original draft: FALR, RNT. Writing - review and editing: All authors. Supervision:

647 RNT.

648

## 649 **Data availability**

650 All computer code used in this paper was written in MATLAB version R2019a, and is available

651 at the following GitHub repository: <https://github.com/francescalovellread/age-dependent->

652 [outbreak-risks](#).

653

## 654 **Funding**

655 FALR acknowledges funding from the Biotechnology and Biological Sciences Research Council

656 (BBSRC), grant number BB/M011224/1. SS was funded by a BBSRC Research Experience

657 Placement and a Rokos award for undergraduate research from Pembroke College Oxford. RNT

658 was supported by UK Research and Innovation (UKRI) via grant EP/V053507/1. The funders

659 had no role in the study design; the collection, analysis and interpretation of data; the writing of

660 the report; or the decision to submit the article for publication.

661

## 662 **References**

663 [1] Perra, N. 2021 Non-pharmaceutical interventions during the COVID-19 pandemic: A review.

664 *Phys. Rep.* **913**, 1-52. (doi:10.1016/j.physrep.2021.02.001).

- 665 [2] Regmi, K. & Lwin, C.M. 2020 Impact of non-pharmaceutical interventions for reducing  
666 transmission of COVID-19: a systematic review and meta-analysis protocol. *BMJ Open* **10**,  
667 e041383. (doi:10.1136/bmjopen-2020-041383).
- 668 [3] Imai, N., Gaythorpe, K.A.M., Abbott, S., Bhatia, S., van Elsland, S., Prem, K., Liu, Y. &  
669 Ferguson, N.M. 2020 Adoption and impact of non-pharmaceutical interventions for COVID-19.  
670 *Wellcome Open Res* **5**, 59-59. (doi:10.12688/wellcomeopenres.15808.1).
- 671 [4] Thompson, R.N., Hollingsworth, T.D., Isham, V., Arribas-Bel, D., Ashby, B., Britton, T.,  
672 Challenor, P., Chappell, L.H.K., Clapham, H., Cunniffe, N.J., et al. 2020 Key questions for  
673 modelling COVID-19 exit strategies. *Proc. R. Soc. Lond. B. Biol. Sci.* **287**, 20201405.  
674 (doi:10.1098/rspb.2020.1405).
- 675 [5] Hatchett, R.J., Mecher, C.E. & Lipsitch, M. 2007 Public health interventions and epidemic  
676 intensity during the 1918 influenza pandemic. *Proc. Natl. Acad. Sci. U. S. A.* **104**, 7582.  
677 (doi:10.1073/pnas.0610941104).
- 678 [6] Kirsch, T.D., Moseson, H., Massaquoi, M., Nyenswah, T.G., Goodermote, R., Rodriguez-  
679 Barraquer, I., Lessler, J., Cumings, D.A.T. & Peters, D.H. 2017 Impact of interventions and the  
680 incidence of ebola virus disease in Liberia—implications for future epidemics. *Health Policy*  
681 *Plan.* **32**, 205-214. (doi:10.1093/heapol/czw113).
- 682 [7] Berkman, B.E. 2008 Mitigating Pandemic Influenza: The Ethics of Implementing a School  
683 Closure Policy. *J. Public Health Manag. Pract.* **14**, 372-378.  
684 (doi:10.1097/01.PHH.0000324566.72533.0b).
- 685 [8] Moore, S., Hill, E.M., Tildesley, M.J., Dyson, L. & Keeling, M.J. 2021 Vaccination and non-  
686 pharmaceutical interventions for COVID-19: a mathematical modelling study. *Lancet Infect Dis*  
687 **21**, 793-802. (doi:10.1016/S1473-3099(21)00143-2).

- 688 [9] Spinelli, M.A., Glidden, D.V., Gennatas, E.D., Bielecki, M., Beyrer, C., Rutherford, G.,  
689 Chambers, H., Goosby, E. & Gandhi, M. 2021 Importance of non-pharmaceutical interventions  
690 in lowering the viral inoculum to reduce susceptibility to infection by SARS-CoV-2 and  
691 potentially disease severity. *Lancet Infect Dis* **21**, E296-E301. (doi:10.1016/S1473-  
692 3099(20)30982-8).
- 693 [10] Thompson, R.N., Hill, E.M. & Gog, J.R. 2021 SARS-CoV-2 incidence and vaccine escape.  
694 *Lancet Infect Dis* **21**, 913-914. (doi:10.1016/S1473-3099(21)00202-4).
- 695 [11] Sachak-Patwa, R., Byrne, H.M., Dyson, L. & Thompson, R.N. 2021 The risk of SARS-  
696 CoV-2 outbreaks in low prevalence settings following the removal of travel restrictions.  
697 *Communications Medicine* **1**, 39. (doi:10.1038/s43856-021-00038-8).
- 698 [12] Donohue, J.M. & Miller, E. 2020 COVID-19 and School Closures. *JAMA* **324**, 845-847.  
699 (doi:10.1001/jama.2020.13092).
- 700 [13] Silverman, M., Sibbald, R. & Stranges, S. 2020 Ethics of COVID-19-related school  
701 closures. *Can. J. Public Health* **111**, 462-465. (doi:10.17269/s41997-020-00396-1).
- 702 [14] Sadique, M.Z., Adams, E.J. & Edmunds, W.J. 2008 Estimating the costs of school closure  
703 for mitigating an influenza pandemic. *BMC Public Health* **8**, 135. (doi:10.1186/1471-2458-8-  
704 135).
- 705 [15] Brooks, S.K., Webster, R.K., Smith, L.E., Woodland, L., Wessely, S., Greenberg, N. &  
706 Rubin, G.J. 2020 The psychological impact of quarantine and how to reduce it: rapid review of  
707 the evidence. *The Lancet* **395**, 912-920. (doi:10.1016/S0140-6736(20)30460-8).
- 708 [16] Loades, M.E., Chatburn, E., Higson-Sweeney, N., Reynolds, S., Shafran, R., Brigden, A.,  
709 Linney, C., McManus, M.N., Borwick, C. & Crawley, E. 2020 Rapid Systematic Review: The  
710 Impact of Social Isolation and Loneliness on the Mental Health of Children and Adolescents in

- 711 the Context of COVID-19. *J. Am. Acad. Child Adolesc. Psychiatry* **59**, 1218-1239.e1213.  
712 (doi:10.1016/j.jaac.2020.05.009).
- 713 [17] Prem, K., Cook, A.R. & Jit, M. 2017 Projecting social contact matrices in 152 countries  
714 using contact surveys and demographic data. *PLoS Comp. Biol.* **13**, e1005697.  
715 (doi:10.1371/journal.pcbi.1005697).
- 716 [18] Mossong, J., Hens, N., Jit, M., Beutels, P., Auranen, K., Mikolajczyk, R., Massari, M.,  
717 Salmaso, S., Tomba, G.S., Wallinga, J., et al. 2008 Social Contacts and Mixing Patterns Relevant  
718 to the Spread of Infectious Diseases. *PLoS Med.* **5**, e74. (doi:10.1371/journal.pmed.0050074).
- 719 [19] Danon, L., Read, J.M., House, T.A., Vernon, M.C. & Keeling, M.J. 2013 Social encounter  
720 networks: characterizing Great Britain. *Proc. R. Soc. Lond. B. Biol. Sci.* **280**, 20131037.  
721 (doi:10.1098/rspb.2013.1037).
- 722 [20] Leung, K., Jit, M., Lau, E.H.Y. & Wu, J.T. 2017 Social contact patterns relevant to the  
723 spread of respiratory infectious diseases in Hong Kong. *Sci. Rep.* **7**. (doi:10.1038/s41598-017-  
724 08241-1).
- 725 [21] Béraud, G., Kazmerczak, S., Beutels, P., Levy-Bruhl, D., Lenne, X., Mielcarek, N.,  
726 Yazdanpanah, Y., Boëlle, P.-Y., Hens, N. & Dervaux, B. 2015 The French Connection: The First  
727 Large Population-Based Contact Survey in France Relevant for the Spread of Infectious  
728 Diseases. *PLoS One* **10**, e0133203. (doi:10.1371/journal.pone.0133203).
- 729 [22] Ibuka, Y., Ohkusa, Y., Sugawara, T., Chapman, G.B., Yamin, D., Atkins, K.E., Taniguchi,  
730 K., Okabe, N. & Galvani, A.P. 2016 Social contacts, vaccination decisions and influenza in  
731 Japan. *J. Epidemiol. Community Health* **70**, 162-167. (doi:10.1136/jech-2015-205777).

- 732 [23] Read, J.M., Lessler, J., Riley, S., Wang, S., Tan, L.J., Kwok, K.O., Guan, Y., Jiang, C.Q. &  
733 Cummings, D.A.T. 2014 Social mixing patterns in rural and urban areas of southern China. *Proc.*  
734 *R. Soc. Lond. B. Biol. Sci.* **281**, 20140268. (doi:10.1098/rspb.2014.0268).
- 735 [24] Read, J.M., Edmunds, W.J., Riley, S., Lessler, J. & Cummings, D.A.T. 2012 Close  
736 encounters of the infectious kind: methods to measure social mixing behaviour. *Epidemiol.*  
737 *Infect.* **140**, 2117-2130. (doi:10.1017/S0950268812000842).
- 738 [25] Wallinga, J., Teunis, P. & Kretzschmar, M. 2006 Using Data on Social Contacts to Estimate  
739 Age-specific Transmission Parameters for Respiratory-spread Infectious Agents. *Am. J.*  
740 *Epidemiol.* **164**, 936-944. (doi:10.1093/aje/kwj317).
- 741 [26] Kucharski, A.J., Kwok, K.O., Wei, V.W.I., Cowling, B.J., Read, J.M., Lessler, J.,  
742 Cummings, D.A. & Riley, S. 2014 The Contribution of Social Behaviour to the Transmission of  
743 Influenza A in a Human Population. *PLoS Pathog.* **10**, e1004206.  
744 (doi:10.1371/journal.ppat.1004206).
- 745 [27] Zhang, J., Litvinova, M., Liang, Y., Wang, Y., Wang, W., Zhao, S., Wu, Q., Merler, S.,  
746 Viboud, C., Vespignani, A., et al. 2020 Changes in contact patterns shape the dynamics of the  
747 COVID-19 outbreak in China. *Science* **368**, 1481-1486. (doi:10.1126/science.abb8001).
- 748 [28] Munro, A.P. & Faust, S.N. 2020 COVID-19 in children: current evidence and key  
749 questions. *Curr. Opin. Infect. Dis.* **33**, 540-547. (doi:10.1097/QCO.0000000000000690).
- 750 [29] Viner, R.M., Mytton, O.T., Bonell, C., Melendez-Torres, G.J., Ward, J., Hudson, L.,  
751 Waddington, C., Thomas, J., Russell, S., van der Klis, F., et al. 2021 Susceptibility to SARS-  
752 CoV-2 Infection Among Children and Adolescents Compared With Adults: A Systematic  
753 Review and Meta-analysis. *JAMA Pediatrics* **175**, 143-156.  
754 (doi:10.1001/jamapediatrics.2020.4573).

- 755 [30] Goldstein, E., Lipsitch, M. & Cevik, M. 2020 On the effect of age on the transmission of  
756 SARS-CoV-2 in households, schools and the community. *J. Infect. Dis.* **223**, 362-369.  
757 (doi:10.1093/infdis/jiaa691).
- 758 [31] Davies, N.G., Klepac, P., Liu, Y., Prem, K., Jit, M., Pearson, C.A.B., Quilty, B.J.,  
759 Kucharski, A.J., Gibbs, H., Clifford, S., et al. 2020 Age-dependent effects in the transmission  
760 and control of COVID-19 epidemics. *Nat. Med.* **26**, 1205-1211. (doi:10.1038/s41591-020-0962-  
761 9).
- 762 [32] Ludvigsson, J.F. 2020 Systematic review of COVID-19 in children shows milder cases and  
763 a better prognosis than adults. *Acta paediatrica (Oslo, Norway : 1992)* **109**, 1088-1095.  
764 (doi:10.1111/apa.15270).
- 765 [33] Dong, Y., Mo, X., Hu, Y., Qi, X., Jiang, F., Jiang, Z. & Tong, S. 2020 Epidemiology of  
766 COVID-19 Among Children in China. *Pediatrics* **145**, e20200702. (doi:10.1542/peds.2020-  
767 0702).
- 768 [34] Siebach, M.K., Piedimonte, G. & Ley, S.H. 2021 COVID-19 in childhood: Transmission,  
769 clinical presentation, complications and risk factors. *Pediatr. Pulmonol.* **56**, 1342-1356.  
770 (doi:10.1002/ppul.25344).
- 771 [35] Mehta, N.S., Mytton, O.T., Mullins, E.W.S., Fowler, T.A., Falconer, C.L., Murphy, O.B.,  
772 Langenberg, C., Jayatunga, W.J.P., Eddy, D.H. & Nguyen-Van-Tam, J.S. 2020 SARS-CoV-2  
773 (COVID-19): What Do We Know About Children? A Systematic Review. *Clin. Infect. Dis.* **71**,  
774 2469-2479. (doi:10.1093/cid/ciaa556).
- 775 [36] Han, M.S., Choi, E.H., Chang, S.H., Jin, B.-L., Lee, E.J., Kim, B.N., Kim, M.K., Doo, K.,  
776 Seo, J.-H., Kim, Y.-J., et al. 2021 Clinical Characteristics and Viral RNA Detection in Children



- 777 With Coronavirus Disease 2019 in the Republic of Korea. *JAMA Pediatrics* **175**, 73-80.  
778 (doi:10.1001/jamapediatrics.2020.3988).
- 779 [37] Pollock, A.M. & Lancaster, J. 2020 Asymptomatic transmission of covid-19. *BMJ* **371**,  
780 m4851. (doi:10.1136/bmj.m4851).
- 781 [38] Buitrago-Garcia, D., Egli-Gany, D., Counotte, M.J., Hossmann, S., Imeri, H., Ipekci, A.M.,  
782 Salanti, G. & Low, N. 2020 Occurrence and transmission potential of asymptomatic and  
783 presymptomatic SARS-CoV-2 infections: A living systematic review and meta-analysis. *PLoS*  
784 *Med.* **17**, e1003346. (doi:10.1371/journal.pmed.1003346).
- 785 [39] Byambasuren, O., Cardona, M., Bell, K., Clark, J., McLaws, M.-L. & Glasziou, P. 2020  
786 Estimating the extent of asymptomatic COVID-19 and its potential for community transmission:  
787 Systematic review and meta-analysis. *JAMMI* **5**, 223-234. (doi:10.3138/jammi-2020-0030).
- 788 [40] Koh, W.C., Naing, L., Chaw, L., Rosledzana, M.A., Alikhan, M.F., Jamaludin, S.A., Amin,  
789 F., Omar, A., Shazli, A., Griffith, M., et al. 2020 What do we know about SARS-CoV-2  
790 transmission? A systematic review and meta-analysis of the secondary attack rate and associated  
791 risk factors. *PLoS One* **15**, e0240205. (doi:10.1371/journal.pone.0240205).
- 792 [41] Madewell, Z.J., Yang, Y., Longini, I.M., Jr., Halloran, M.E. & Dean, N.E. 2020 Household  
793 Transmission of SARS-CoV-2: A Systematic Review and Meta-analysis. *JAMA Network Open*  
794 **3**, e2031756-e2031756. (doi:10.1001/jamanetworkopen.2020.31756).
- 795 [42] Qiu, X., Nergiz, A.I., Maraolo, A.E., Bogoch, I.I., Low, N. & Cevik, M. 2021 Defining the  
796 role of asymptomatic and pre-symptomatic SARS-CoV-2 transmission - a living systematic  
797 review. *Clin. Microbiol. Infect.* **27**, 511-519. (doi:10.1016/j.cmi.2021.01.011).
- 798 [43] Pijls, B.G., Jolani, S., Atherley, A., Derckx, R.T., Dijkstra, J.I.R., Franssen, G.H.L.,  
799 Hendriks, S., Richters, A., Venemans-Jellema, A., Zalpuri, S., et al. 2021 Demographic risk

800 factors for COVID-19 infection, severity, ICU admission and death: a meta-analysis of 59  
801 studies. *BMJ Open* **11**, e044640. (doi:10.1136/bmjopen-2020-044640).

802 [44] Verity, R., Okell, L.C., Dorigatti, I., Winskill, P., Whittaker, C., Imai, N., Cuomo-  
803 Dannenburg, G., Thompson, H., Walker, P.G.T., Fu, H., et al. 2020 Estimates of the severity of  
804 coronavirus disease 2019: a model-based analysis. *Lancet Infect Dis* **20**, 669-677.  
805 (doi:10.1016/S1473-3099(20)30243-7).

806 [45] Chen, T., Dai, Z., Mo, P., Li, X., Ma, Z., Song, S., Chen, X., Luo, M., Liang, K., Gao, S., et  
807 al. 2020 Clinical Characteristics and Outcomes of Older Patients with Coronavirus Disease 2019  
808 (COVID-19) in Wuhan, China: A Single-Centered, Retrospective Study. *J. Gerontol. A Biolo.*  
809 *Sci. Med. Sci.* **75**, 1788-1795. (doi:10.1093/gerona/glaa089).

810 [46] Prem, K., Liu, Y., Russell, T.W., Kucharski, A.J., Eggo, R.M., Davies, N., Flasche, S.,  
811 Clifford, S., Pearson, C.A.B., Munday, J.D., et al. 2020 The effect of control strategies to reduce  
812 social mixing on outcomes of the COVID-19 epidemic in Wuhan, China: a modelling study.  
813 *Lancet Public Health* **5**, e261-e270. (doi:10.1016/S2468-2667(20)30073-6).

814 [47] Davies, N.G., Kucharski, A.J., Eggo, R.M., Gimma, A., Edmunds, W.J. & Centre for the  
815 Mathematical Modelling of Infectious Diseases COVID-19 working group. 2020 Effects of non-  
816 pharmaceutical interventions on COVID-19 cases, deaths, and demand for hospital services in  
817 the UK: a modelling study. *Lancet Public Health* **5**, e375-e385. (doi:10.1016/S2468-  
818 2667(20)30133-X).

819 [48] Liu, T., Gong, D., Xiao, J., Hu, J., He, G., Rong, Z. & Ma, W. 2020 Cluster infections play  
820 important roles in the rapid evolution of COVID-19 transmission: A systematic review. *Int. J.*  
821 *Infect. Dis.* **99**, 374-380. (doi:10.1016/j.ijid.2020.07.073).

- 822 [49] Leclerc, Q., Fuller, N., Knight, L., CMMID COVID-19 Working Group, Funk, S. & Knight,  
823 G. 2020 What settings have been linked to SARS-CoV-2 transmission clusters? [version 2; peer  
824 review: 2 approved]. *Wellcome Open Res* **5**. (doi:10.12688/wellcomeopenres.15889.2).
- 825 [50] Rossman, H., Keshet, A., Shilo, S., Gavrieli, A., Bauman, T., Cohen, O., Shelly, E., Balicer,  
826 R., Geiger, B., Dor, Y., et al. 2020 A framework for identifying regional outbreak and spread of  
827 COVID-19 from one-minute population-wide surveys. *Nat. Med.* **26**, 634-638.  
828 (doi:10.1038/s41591-020-0857-9).
- 829 [51] Althaus, C.L., Low, N., Musa, E.O., Shuaib, F. & Gsteiger, S. 2015 Ebola virus disease  
830 outbreak in Nigeria: Transmission dynamics and rapid control. *Epidemics* **11**, 80-84.  
831 (doi:10.1016/j.epidem.2015.03.001).
- 832 [52] Thompson, R.N., Jalava, K. & Obolski, U. 2019 Sustained transmission of Ebola in new  
833 locations: more likely than previously thought. *Lancet Infect Dis* **19**, 1058-1059.  
834 (doi:10.1016/S1473-3099(19)30483-9).
- 835 [53] Thompson, R.N. 2020 Novel Coronavirus Outbreak in Wuhan, China, 2020: Intense  
836 Surveillance Is Vital for Preventing Sustained Transmission in New Locations. *J. Clin. Med.* **9**,  
837 498. (doi:10.3390/jcm9020498).
- 838 [54] Hellewell, J., Abbott, S., Gimma, A., Bosse, N.I., Jarvis, C.I., Russell, T.W., Munday, J.D.,  
839 Kucharski, A.J., Edmunds, W.J., Sun, F., et al. 2020 Feasibility of controlling COVID-19  
840 outbreaks by isolation of cases and contacts. *Lancet Glob. Health* **8**, e488-e496.  
841 (doi:10.1016/S2214-109X(20)30074-7).
- 842 [55] Lovell-Read, F.A., Funk, S., Obolski, U., Donnelly, C.A. & Thompson, R.N. 2021  
843 Interventions targeting nonsymptomatic cases can be important to prevent local outbreaks:  
844 SARS-CoV-2 as a case-study. *J. R. Soc. Interface* **18**, 20201014. (doi:10.1098/rsif.2020.1014).

- 845 [56] Nishiura, H., Cook, A.R. & Cowling, B.J. 2011 Assortativity and the Probability of  
846 Epidemic Extinction: A Case Study of Pandemic Influenza A (H1N1-2009). *Interdiscip.*  
847 *Perspect. Infect. Dis.* **2011**, 194507. (doi:10.1155/2011/194507).
- 848 [57] Ferretti, L., Wymant, C., Kendall, M., Zhao, L., Nurtay, A., Abeler-Dorner, L., Parker, M.,  
849 Bonsall, D. & Fraser, C. 2020 Quantifying SARS-CoV-2 transmission suggests epidemic control  
850 with digital contact tracing. *Science* **368**, eabb6936. (doi:10.1126/science.abb6936).
- 851 [58] United Nations, Department of Economic and Social Affairs, Population Division. 2019  
852 World Population Prospects 2019, Online Edition, Rev. 1. Available at:  
853 <https://population.un.org/wpp/Download/Standard/Population/>.
- 854 [59] Wei, W.E., Li, Z., Chiew, C.J., Yong, S.E., Toh, M.P. & Lee, V.J. 2020 Presymptomatic  
855 Transmission of SARS-CoV-2 — Singapore, January 23–March 16, 2020. *Morb. Mortal. Weekly*  
856 *Rep.* **69**, 411-415. (doi:10.15585/mmwr.mm6914e1external icon).
- 857 [60] Arons, M.M., Hatfield, K.M., Reddy, S.C., Kimball, A., James, A., Jacobs, J.R., Taylor, J.,  
858 Spicer, K., Bardossy, A.C., Oakley, L.P., et al. 2020 Presymptomatic SARS-CoV-2 Infections  
859 and Transmission in a Skilled Nursing Facility. *N. Engl. J. Med.* **382**, 2081-2090.  
860 (doi:10.1056/NEJMoa2008457).
- 861 [61] Bullard, J., Dust, K., Funk, D., Strong, J.E., Alexander, D., Garnett, L., Boodman, C., Bello,  
862 A., Hedley, A., Schiffman, Z., et al. 2020 Predicting Infectious Severe Acute Respiratory  
863 Syndrome Coronavirus 2 From Diagnostic Samples. *Clin. Infect. Dis.* **71**, 2663-2666.  
864 (doi:10.1093/cid/ciaa638).
- 865 [62] Wolfel, R., Corman, V.M., Guggemos, W., Seilmaier, M., Zange, S., Muller, M.A.,  
866 Niemeyer, D., Jones, T.C., Vollmar, P., Rothe, C., et al. 2020 Virological assessment of

- 867 hospitalized patients with COVID-2019. *Nature* **581**, 465-469. (doi:10.1038/s41586-020-2196-  
868 x).
- 869 [63] Lai, C.-C., Shih, T.-P., Ko, W.-C., Tang, H.-J. & Hsueh, P.-R. 2020 Severe acute respiratory  
870 syndrome coronavirus 2 (SARS-CoV-2) and coronavirus disease-2019 (COVID-19): The  
871 epidemic and the challenges. *Int. J. Antimicrob. Agents* **55**, 105924.  
872 (doi:10.1016/j.ijantimicag.2020.105924).
- 873 [64] Liu, Y., Gayle, A.A., Wilder-Smith, A. & Rocklöv, J. 2020 The reproductive number of  
874 COVID-19 is higher compared to SARS coronavirus. *J. Travel Med.* **27**, taaa021.  
875 (doi:10.1093/jtm/taaa021).
- 876 [65] Zhai, P., Ding, Y., Wu, X., Long, J., Zhong, Y. & Li, Y. 2020 The epidemiology, diagnosis  
877 and treatment of COVID-19. *Int. J. Antimicrob. Agents* **55**, 105955-105955.  
878 (doi:10.1016/j.ijantimicag.2020.105955).
- 879 [66] Zhao, S., Lin, Q., Ran, J., Musa, S.S., Yang, G., Wang, W., Lou, Y., Gao, D., Yang, L., He,  
880 D., et al. 2020 Preliminary estimation of the basic reproduction number of novel coronavirus  
881 (2019-nCoV) in China, from 2019 to 2020: A data-driven analysis in the early phase of the  
882 outbreak. *Int. J. Infect. Dis.* **92**, 214-217. (doi:10.1016/j.ijid.2020.01.050).
- 883 [67] Thompson, R.N., Gilligan, C.A. & Cunniffe, N.J. 2020 Will an outbreak exceed available  
884 resources for control? Estimating the risk from invading pathogens using practical definitions of  
885 a severe epidemic. *J. R. Soc. Interface* **17**, 20200690. (doi:10.1098/rsif.2020.0690).
- 886 [68] Norris, J.R. 1997 *Markov Chains (Cambridge Series in Statistical and Probabilistic*  
887 *Mathematics)*. Cambridge, Cambridge University Press.

- 888 [69] Hart, W.S., Maini, P.K. & Thompson, R.N. 2021 High infectiousness immediately before  
889 COVID-19 symptom onset highlights the importance of continued contact tracing. *Elife* **10**.  
890 (doi:10.7554/eLife.65534).
- 891 [70] Huang, Q.S., Wood, T., Jelley, L., Jennings, T., Jefferies, S., Daniells, K., Nesdale, A.,  
892 Dowell, T., Turner, N., Campbell-Stokes, P., et al. 2021 Impact of the COVID-19  
893 nonpharmaceutical interventions on influenza and other respiratory viral infections in New  
894 Zealand. *Nat. Commun.* **12**, 1001. (doi:10.1038/s41467-021-21157-9).
- 895 [71] Flaxman, S., Mishra, S., Gandy, A., Unwin, H.J.T., Mellan, T.A., Coupland, H., Whittaker,  
896 C., Zhu, H., Berah, T., Eaton, J.W., et al. 2020 Estimating the effects of non-pharmaceutical  
897 interventions on COVID-19 in Europe. *Nature* **584**, 257-261. (doi:10.1038/s41586-020-2405-7).
- 898 [72] Borse, R.H., Behravesh, C.B., Dumanovsky, T., Zucker, J.R., Swerdlow, D., Edelson, P.,  
899 Choe-Castillo, J. & Meltzer, M.I. 2011 Closing Schools in Response to the 2009 Pandemic  
900 Influenza A H1N1 Virus in New York City: Economic Impact on Households. *Clin. Infect. Dis.*  
901 **52**, S168-S172. (doi:10.1093/cid/ciq033).
- 902 [73] Greer, A.L., Tuite, A. & Fisman, D.N. 2010 Age, influenza pandemics and disease  
903 dynamics. *Epidemiol. Infect.* **138**, 1542-1549. (doi:10.1017/S0950268810000579).
- 904 [74] Clohisey, S. & Baillie, J.K. 2019 Host susceptibility to severe influenza A virus infection.  
905 *Crit. Care* **23**, 303. (doi:10.1186/s13054-019-2566-7).
- 906 [75] Campbell, F., Archer, B., Laurenson-Schafer, H., Jinnai, Y., Konings, F., Batra, N., Pavlin,  
907 B., Vandemaele, K., Van Kerkhove, M.D., Jombart, T., et al. 2021 Increased transmissibility and  
908 global spread of SARS-CoV-2 variants of concern as at June 2021. *Eurosurveillance* **26**,  
909 2100509. (doi:10.2807/1560-7917.ES.2021.26.24.2100509).

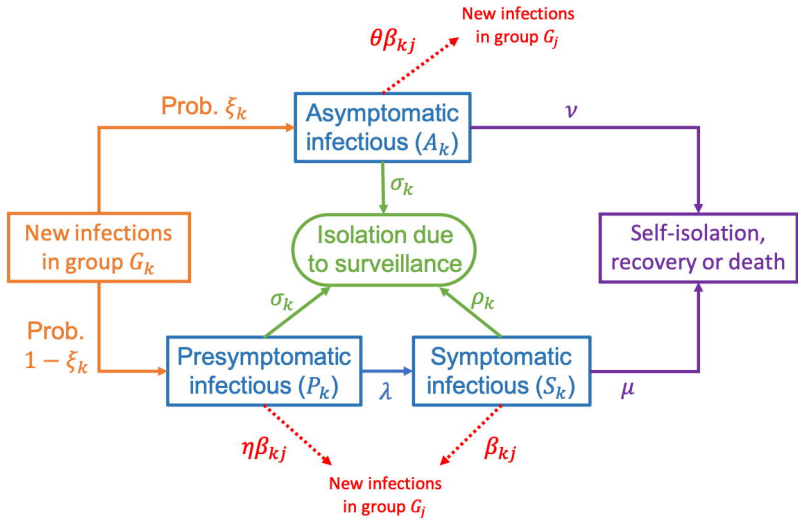

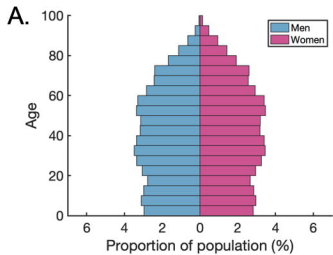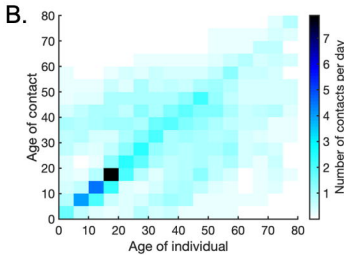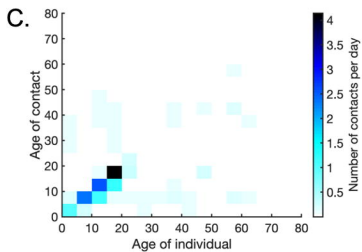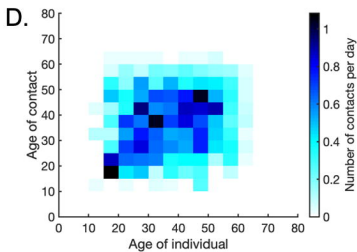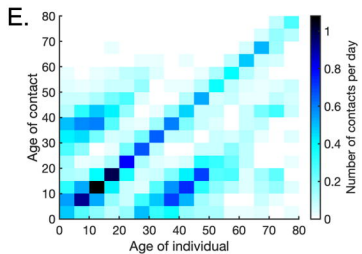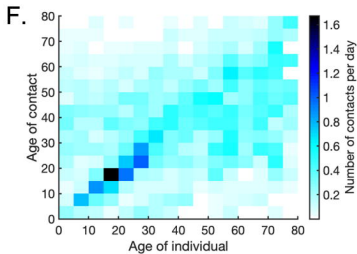



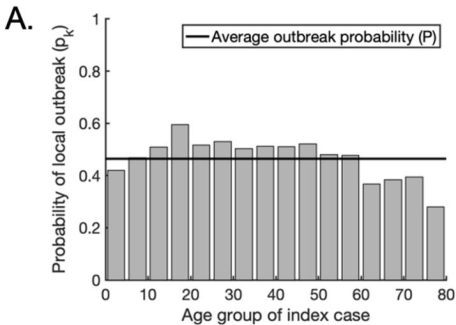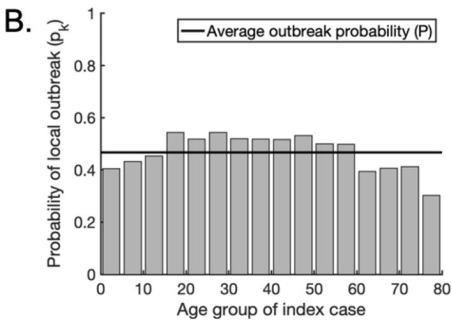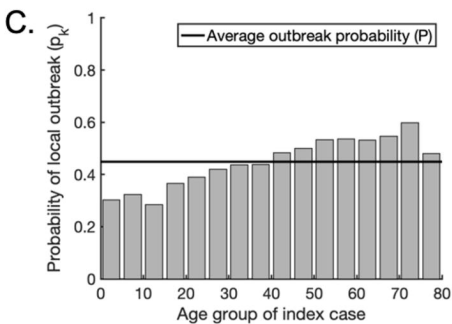

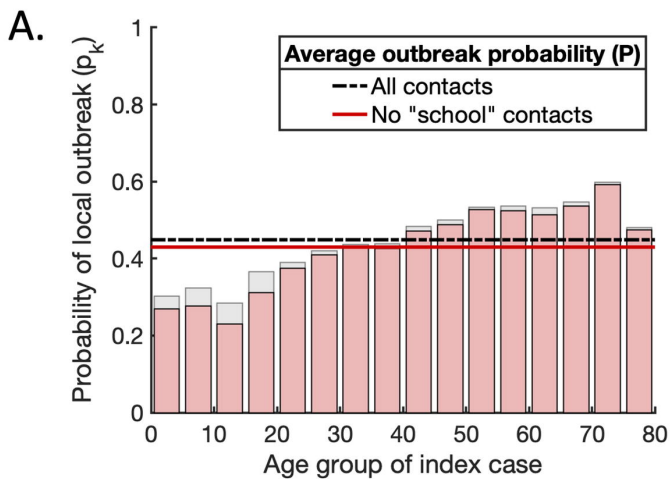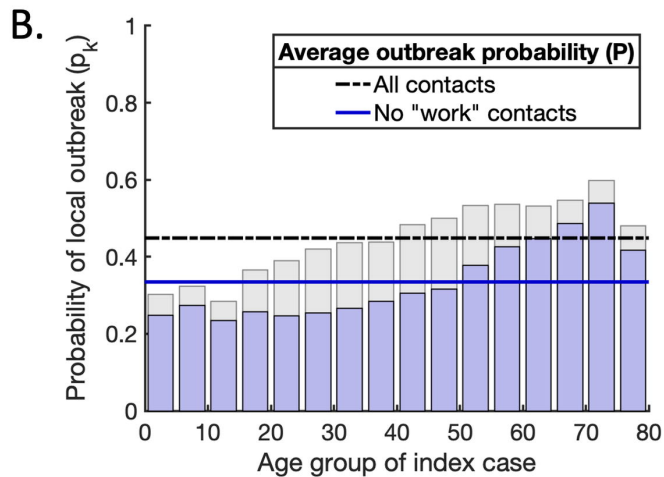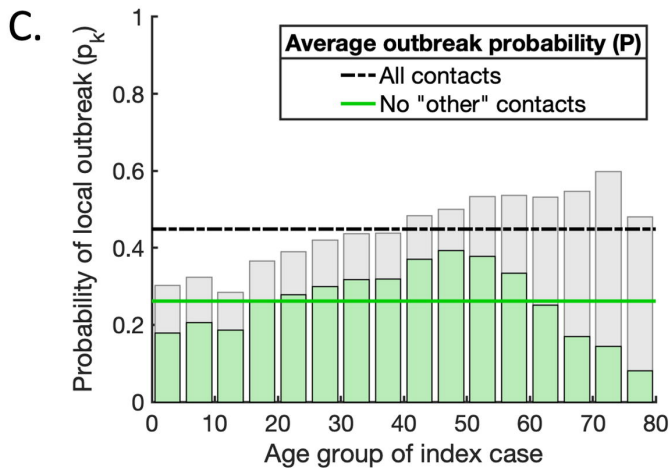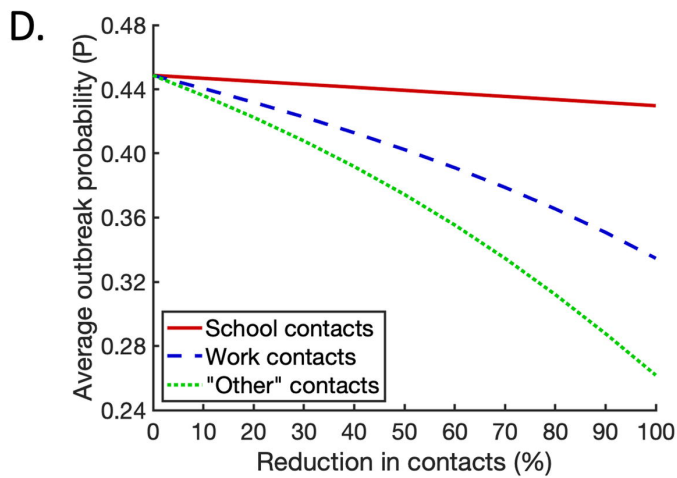

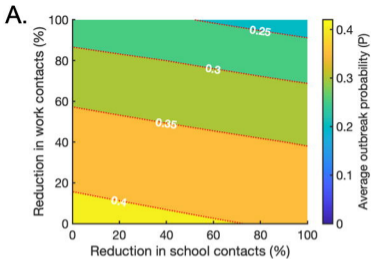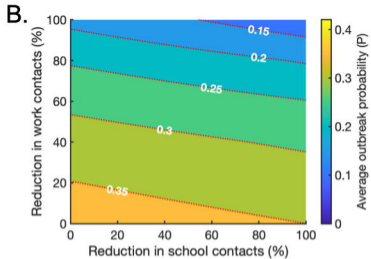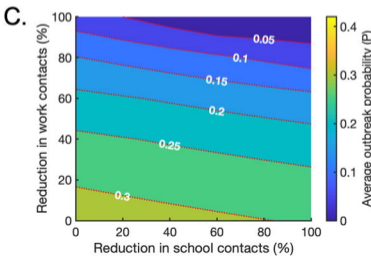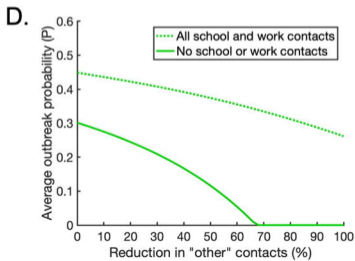

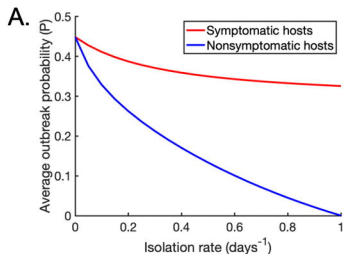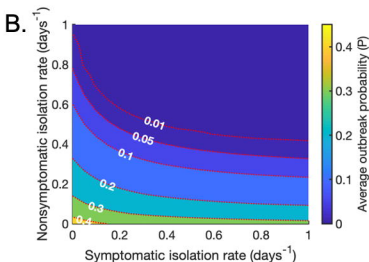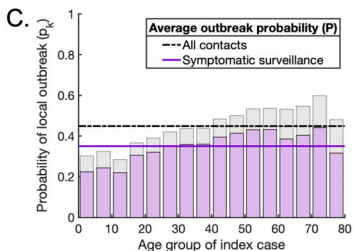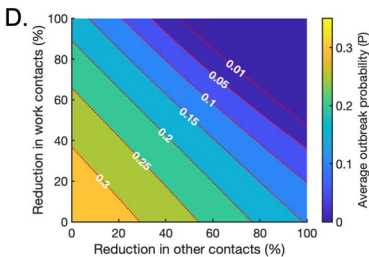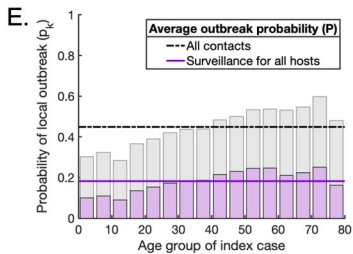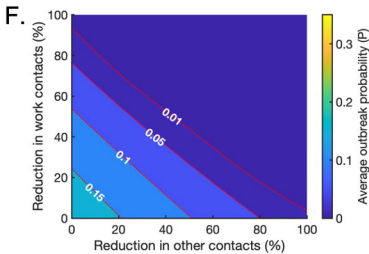

Source: https://medrxiv.org/content/medrxiv/early/2021/12/02/2021.04.27.21256163.full.pdf
